# Supplementary material
Source: Research Square preprint supplement (doi:10.21203/rs.3.rs-8910578/v1)
Supplement: Supplementary file 1 [file 1b03f8d347075d208360f3a2.docx]

**Variable Coding, Definitions, and Transformations**

# A. Demographic Variables

| **Variable** | **Definition** | **Coding** |
| --- | --- | --- |
| Gender | Sex of owner/manager | 0 = Male; 1 = Female |
| Age | Age group of owner/manager | 1=<25; 2=25–34; 3=35–44; 4=45–54; 5=55+ |
| Education_Level | Highest education level | 1=Primary; 2=Secondary; 3=TVET; 4=Diploma; 5=Degree; 6=Postgraduate |
| Business_Age | Age of the business | 1=<2 yrs; 2=2–5 yrs; 3=6–10 yrs; 4=>10 yrs |
| Firm_Size | Number of employees | 1=1–5; 2=6–30; 3=31–100 |
| Industry_Type | Sector of SME | 1=Agriculture; 2=Service; 3=Retail/Trade; 4=Manufacturing; 5=Other |
| Ownership_Structure | Type of ownership | 1=Sole proprietor; 2=Partnership; 3=Family-owned; 4=Private Limited |

**Likert Scale used for all construct items:** 1 = Strongly Disagree; 2 = Disagree; 3 = Neutral; 4 = Agree; 5 = Strongly Agree

## Financial Literacy (FL1–FL5)

| Item | Questionnaire statement | Scale |
| --- | --- | --- |
| FL1 | I understand basic accounting principles. | 1–5 |
| FL2 | I can correctly interpret financial statements. | 1–5 |
| FL3 | I have adequate experience in managing business finances. | 1–5 |
| FL4 | I regularly analyze my business financial performance. | 1–5 |
| FL5 | I feel confident making financial decisions for my business. | 1–5 |

## Business Characteristics (BC1–BC4)

| Item | Questionnaire statement | Scale |
| --- | --- | --- |
| BC1 | My business size allows me to implement structured financial systems. | 1–5 |
| BC2 | As the business grows, financial management becomes more formal. | 1–5 |
| BC3 | The nature of my industry influences how I manage finances. | 1–5 |
| BC4 | The age of my business helps determine the financial practices I use. | 1–5 |

## Access to Finance (ACF1–ACF5)

| Item | Questionnaire statement | Scale |
| --- | --- | --- |
| ACF1 | My business has easy access to credit from financial institutions. | 1–5 |
| ACF2 | Collateral requirements make it difficult to obtain loans. | 1–5 |
| ACF3 | The interest rates offered by lenders affect my borrowing decisions. | 1–5 |
| ACF4 | I have good relationships with banks and microfinance institutions. | 1–5 |
| ACF5 | Access to external finance improves my financial management activities. | 1–5 |

## External Environment (EXE1–EXE4)

| Item | Questionnaire statement | Scale |
| --- | --- | --- |
| EXE1 | Inflation affects my business financial decisions. | 1–5 |
| EXE2 | Government regulations influence how I manage my finances. | 1–5 |
| EXE3 | Tax policies affect my financial planning. | 1–5 |
| EXE4 | Competition in the market impacts financial management. | 1–5 |

## Technology & Digitalization (TD1–TD4)

| Item | Questionnaire statement | Scale |
| --- | --- | --- |
| TD1 | I use accounting software (e.g., QuickBooks, Peachtree). | 1–5 |
| TD2 | I use mobile money/digital payments for transactions. | 1–5 |
| TD3 | Technology helps me improve financial recordkeeping. | 1–5 |
| TD4 | Fintech services make it easier to access financing. | 1–5 |

## Human Capital (HC1–HC3)

| Item | Questionnaire statement | Scale |
| --- | --- | --- |
| HC1 | My staff are skilled in accounting and recordkeeping. | 1–5 |
| HC2 | Employees receive training in financial management. | 1–5 |
| HC3 | The business has clear separation of duties for financial tasks. | 1–5 |

## Strategic Orientation (SO1–SO3)

| Item | Questionnaire statement | Scale |
| --- | --- | --- |
| SO1 | My business has a clear growth strategy. | 1–5 |
| SO2 | Financial planning supports business expansion. | 1–5 |
| SO3 | We plan investments carefully based on financial forecasts. | 1–5 |

## Financial Management Practice (FM1–FM4)

| Item | Questionnaire statement | Scale |
| --- | --- | --- |
| FM1 | Firm demonstrates strong financial knowledge (budgets, cash flow, products, financing sources). | 1–5 |
| FM2 | Firm maintains a responsible financial attitude (control expenses, goals, risk balance). | 1–5 |
| FM3 | Firm exercises effective financial control (monitor debt, accuracy, regular review, accountability). | 1–5 |
| FM4 | Firm saves consistently, keeps reserves, plans investments from savings, reduces borrowing. | 1–5 |

# B. Composite Variables & Transformations

| Composite Variable | Formula | Scale & Interpretation |
| --- | --- | --- |
| Financialliteracy_composite | Mean of FL1–FL5 | [1–5], higher = more financial literacy |
| Business_Characteristics_composite | Mean of BC1–BC4 | [1–5], higher = stronger structure/context |
| Access_to_Finance_composite | Mean of ACF1–ACF5 | [1–5], higher = better access/conditions |
| External_Environment_composite | Mean of EXE1–EXE4 | [1–5], higher = stronger external influence (as perceived) |
| Technology_Digitalization_composite | Mean of TD1–TD4 | [1–5], higher = more tech/digital use |
| Human_Capital_composite | Mean of HC1–HC3 | [1–5], higher = stronger staff capability |
| Strategic_Orientation | Mean of SO1–SO3 | [1–5], higher = stronger strategic posture |
| FMP_composite | Mean of FM1–FM4 | [1–5], higher = better financial management practice |
