# Supplementary material
Source: Research Square preprint supplement (doi:10.21203/rs.3.rs-8910578/v1)
Supplement: Supplementary file 2 [file 3559fed2c74be303185c30b3.xlsx]

## Sheet: Variables 
Respondent_ID	Gender	Age	Education_Level	Business_Age	Firm_Size	Industry_Type	Ownership_Structure	FL1	FL2	FL3	FL4	FL5	BC1	BC2	BC3	BC4	ACF1	ACF2	ACF3	ACF4	ACF5	FR1	FR2	FR3	FR4	FR5	FR6	EXE1	EXE2	EXE3	EXE4	TD1	TD2	TD3	TD4	HC1	HC2	HC3	SO1	SO2	SO3	FM1	FM2	FM3	FM4	FMP_composite	Financialliteracy_composite	Business_Characteristics_composite	Access_to_Finance_composite
1	0	2	5	4	3	4	1	4	4	5	4	5	5	4	5	4	4	5	4	4	4	5	5	4	4	4	5	5	4	4	5	5	4	5	4	4	4	4	5	4	5	4	4	4	4	4	4.4	4.5	4.2
2	0	2	5	4	3	4	2	4	5	5	4	5	5	4	4	4	4	5	5	4	5	5	5	4	4	4	5	5	5	4	5	4	5	5	4	4	4	4	5	4	5	4	5	4	4	4.25	4.6	4.25	4.6
3	1	3	5	4	3	4	3	4	5	5	4	5	5	4	5	4	4	5	5	4	5	5	5	4	4	4	5	5	5	4	5	5	5	5	5	4	4	5	5	5	5	4	5	4	5	4.5	4.6	4.5	4.6
4	1	3	5	4	3	4	4	4	5	5	4	5	5	4	5	4	4	5	5	4	5	5	5	4	4	4	5	5	5	4	5	4	5	5	5	4	4	5	5	5	5	4	5	4	5	4.5	4.6	4.5	4.6
5	0	3	5	4	3	4	3	4	5	5	4	5	5	4	5	4	4	5	5	4	5	5	5	5	4	4	5	5	5	4	5	5	5	4	5	4	4	5	5	5	5	4	5	4	5	4.5	4.6	4.5	4.6
6	1	3	5	4	3	4	1	4	5	4	4	5	5	4	5	4	4	5	5	4	5	5	5	5	4	4	5	5	5	4	5	4	5	4	5	4	4	5	5	5	5	4	5	4	5	4.5	4.4	4.5	4.6
7	0	3	5	4	3	4	2	4	5	4	4	5	5	4	5	4	4	5	5	4	5	5	5	5	4	4	5	5	5	4	5	5	5	4	5	4	4	5	5	5	5	4	5	4	5	4.5	4.4	4.5	4.6
8	0	4	5	4	3	4	3	4	5	4	4	4	5	4	5	4	4	5	5	4	5	5	5	5	4	4	5	5	5	4	5	4	5	4	5	4	4	5	5	5	5	4	5	4	5	4.5	4.2	4.5	4.6
9	0	4	5	4	3	4	4	4	5	4	4	4	5	4	5	4	4	5	5	4	5	5	5	5	4	4	5	5	5	4	5	5	5	4	5	4	4	5	5	5	5	4	5	4	5	4.5	4.2	4.5	4.6
10	0	4	5	4	3	4	1	4	5	4	5	5	5	4	5	4	4	5	5	4	5	5	5	5	4	4	5	5	5	4	5	4	5	4	5	4	4	5	5	5	5	4	5	4	5	4.5	4.6	4.5	4.6
11	0	4	5	4	3	4	2	4	5	4	5	5	5	4	5	4	4	5	5	4	5	5	5	5	4	4	5	5	5	4	5	5	5	4	5	4	4	5	5	5	5	4	5	4	5	4.5	4.6	4.5	4.6
12	0	4	5	3	3	4	3	4	5	4	5	5	5	4	5	4	4	5	5	4	5	5	5	5	4	4	5	5	5	4	5	4	5	4	5	4	4	5	5	5	5	4	5	4	5	4.5	4.6	4.5	4.6
13	0	5	5	4	3	4	4	4	5	4	5	5	5	4	5	4	4	5	5	4	5	5	5	5	4	4	5	5	5	4	5	5	5	4	5	4	4	5	4	5	5	4	5	4	5	4.5	4.6	4.5	4.6
14	0	2	5	4	3	4	3	4	5	4	4	5	5	4	5	4	4	5	5	4	5	4	5	5	4	4	5	5	5	4	5	4	5	4	5	4	4	5	4	5	5	4	5	4	5	4.5	4.4	4.5	4.6
15	0	2	5	4	3	4	2	4	5	5	4	5	5	4	5	4	4	5	5	4	5	4	5	5	4	4	5	5	5	4	5	5	5	4	5	4	4	5	4	5	5	4	5	4	5	4.5	4.6	4.5	4.6
16	1	2	5	4	3	4	1	4	5	5	4	5	5	3	5	4	4	5	5	4	5	4	5	5	4	4	5	5	5	3	5	4	5	5	5	4	3	5	4	5	3	4	5	3	5	4.25	4.6	4.25	4.6
17	0	2	5	4	3	4	2	4	5	5	4	5	5	4	5	4	4	5	5	4	5	4	5	5	4	4	5	5	5	4	5	5	5	5	5	4	4	5	4	5	3	4	5	4	5	4.5	4.6	4.5	4.6
18	0	2	5	4	3	4	3	4	4	5	4	4	4	4	5	4	4	5	4	4	4	4	5	5	4	4	5	5	4	4	5	4	4	5	5	4	4	5	4	5	3	4	4	4	5	4.25	4.2	4.25	4.2
19	1	3	4	4	3	4	1	4	4	5	4	4	4	4	5	4	4	5	4	4	4	4	5	5	4	4	5	5	4	4	5	5	4	5	5	4	4	5	4	5	3	4	4	4	5	4.25	4.2	4.25	4.2
20	1	3	4	4	3	4	1	4	4	5	4	4	4	4	5	4	4	5	4	4	4	4	5	5	4	4	5	5	4	4	5	4	4	5	5	4	4	5	4	5	4	4	4	4	5	4.25	4.2	4.25	4.2
21	1	3	4	4	3	2	1	4	4	5	4	4	4	4	3	3	4	5	4	4	4	4	5	4	4	4	5	5	4	4	5	5	4	5	3	4	4	3	4	3	4	4	4	4	3	3.75	4.2	3.5	4.2
22	0	4	4	4	3	3	1	4	4	5	4	4	4	4	5	5	4	4	4	4	4	4	5	4	4	5	5	5	4	4	5	4	4	5	5	4	4	5	4	5	4	4	4	4	5	4.25	4.2	4.5	4
23	0	4	4	3	3	3	4	4	4	5	4	4	4	4	5	5	4	4	4	4	4	4	5	4	4	5	5	5	4	4	5	5	4	5	5	4	4	5	4	5	4	4	4	4	5	4.25	4.2	4.5	4
24	0	4	4	3	3	3	4	4	4	5	4	4	4	4	5	5	4	4	4	4	4	4	5	4	4	5	5	5	4	4	5	4	4	5	5	4	4	5	4	5	4	4	4	4	5	4.25	4.2	4.5	4
25	0	2	4	3	3	3	4	4	4	5	4	4	4	4	5	5	4	4	4	4	4	4	5	4	5	5	5	5	4	4	5	5	4	5	5	4	4	5	4	5	4	4	4	4	5	4.25	4.2	4.5	4
26	0	2	4	3	3	3	4	4	4	5	4	4	4	4	5	5	4	4	4	4	4	4	5	4	5	5	5	5	4	4	5	4	4	5	5	4	4	5	4	5	4	4	4	4	5	4.25	4.2	4.5	4
27	1	2	4	3	3	3	4	4	4	5	4	4	4	4	5	5	4	4	4	4	4	4	5	4	5	5	5	5	4	4	5	5	4	5	5	4	4	5	4	5	4	4	4	4	5	4.25	4.2	4.5	4
28	1	5	4	3	3	3	4	4	4	5	4	4	4	4	5	5	4	4	4	4	4	4	5	4	5	5	5	5	4	4	5	4	4	5	5	4	4	5	4	5	4	4	4	4	5	4.25	4.2	4.5	4
29	1	3	4	3	3	3	4	4	4	5	4	4	4	4	5	5	4	4	4	4	4	4	5	4	5	5	5	5	4	4	5	5	4	5	5	4	4	5	4	5	4	4	4	4	5	4.25	4.2	4.5	4
30	1	3	4	3	3	3	3	4	4	5	4	4	4	3	5	5	4	4	4	4	4	5	5	4	5	5	5	5	4	3	5	4	4	5	5	4	3	5	4	5	4	4	4	3	5	4	4.2	4.25	4
31	0	3	4	3	3	3	3	4	4	5	4	4	4	4	5	5	4	4	4	4	4	5	5	4	5	5	5	5	4	4	5	5	4	4	5	4	4	5	4	5	4	4	4	4	5	4.25	4.2	4.5	4
32	0	3	4	3	3	3	3	4	4	5	5	4	4	4	5	5	4	4	4	4	4	5	5	4	5	5	5	5	4	4	5	4	4	4	5	4	4	5	4	5	4	4	4	4	5	4.25	4.4	4.5	4
33	0	3	4	3	3	3	3	4	4	5	5	4	4	4	5	5	4	4	4	4	4	5	5	4	5	5	5	5	4	4	5	5	4	4	5	4	4	5	4	5	4	4	4	4	5	4.25	4.4	4.5	4
34	0	2	4	3	3	3	2	4	4	5	5	4	4	4	5	5	4	4	4	4	4	5	5	4	5	5	5	5	4	4	5	4	4	4	5	4	4	5	4	5	4	4	4	4	5	4.25	4.4	4.5	4
35	0	2	4	3	3	3	4	4	4	5	5	4	4	4	4	5	4	4	4	4	4	5	5	4	5	5	5	5	4	4	5	5	4	4	4	4	4	4	4	4	4	4	4	4	4	4	4.4	4.25	4
36	0	2	4	3	3	3	4	4	4	5	5	4	4	4	4	5	4	4	4	4	4	5	5	4	5	5	5	5	4	4	5	5	4	4	4	4	4	4	4	4	4	4	4	4	4	4	4.4	4.25	4
37	0	2	4	3	3	3	4	4	4	5	5	4	4	4	4	5	4	4	4	4	4	5	5	4	4	5	5	5	4	4	5	5	4	4	4	4	4	4	4	4	4	4	4	4	4	4	4.4	4.25	4
38	1	2	4	3	3	3	4	4	4	5	5	4	4	4	4	5	4	4	4	4	4	5	5	4	4	5	5	5	4	4	5	5	4	4	4	4	4	4	4	4	4	4	4	4	4	4	4.4	4.25	4
39	1	2	4	3	3	3	2	4	4	5	5	4	4	4	4	5	4	4	4	4	4	5	5	4	4	5	5	5	4	4	5	4	4	4	4	4	4	4	4	4	4	4	4	4	4	4	4.4	4.25	4
40	1	4	4	3	3	3	2	4	4	4	5	4	4	4	4	5	4	4	4	4	4	5	5	4	4	5	5	5	4	4	5	5	4	4	4	4	4	4	4	4	4	4	4	4	4	4	4.2	4.25	4
41	0	4	4	3	3	3	1	4	4	4	5	4	4	4	4	5	4	4	4	4	4	5	5	4	4	5	5	5	4	4	5	5	4	4	4	4	4	4	4	4	4	4	4	4	4	4	4.2	4.25	4
42	0	4	5	3	3	3	1	4	4	4	5	4	4	4	4	5	4	4	4	4	4	5	5	4	4	5	5	5	4	4	5	5	4	4	4	4	4	4	4	4	4	4	4	4	4	4	4.2	4.25	4
43	0	4	5	3	3	3	1	4	4	4	5	4	4	4	4	5	4	4	4	4	4	5	5	4	4	5	5	5	4	4	5	5	4	4	4	4	4	4	4	4	4	4	4	4	4	4	4.2	4.25	4
44	0	4	5	3	3	3	3	4	4	4	5	4	4	4	4	5	4	4	4	4	4	5	5	4	4	5	5	5	4	4	5	5	4	4	4	4	4	4	4	4	4	4	4	4	4	4	4.2	4.25	4
45	0	4	5	3	3	3	3	4	4	4	5	4	4	4	4	5	4	4	4	4	4	5	5	4	4	5	5	5	4	4	5	4	4	4	4	4	4	4	4	4	4	4	4	4	4	4	4.2	4.25	4
46	0	3	5	3	3	3	3	4	4	4	5	4	4	4	4	5	4	4	4	4	4	5	5	4	4	5	5	5	4	4	5	5	4	4	4	4	4	4	4	4	4	4	4	4	4	4	4.2	4.25	4
47	0	3	5	3	3	3	2	4	4	4	5	4	4	4	4	5	4	4	4	4	4	5	5	4	4	5	5	5	4	4	5	5	4	4	4	4	4	4	4	4	4	4	4	4	4	4	4.2	4.25	4
48	0	3	5	3	3	3	1	4	4	4	5	4	4	4	4	5	5	4	4	4	4	5	5	4	4	5	5	5	4	4	5	5	4	4	4	4	4	4	4	4	4	4	4	4	4	4	4.2	4.25	4.2
49	0	3	5	3	3	3	1	4	4	4	5	4	4	4	4	5	5	4	4	4	4	5	5	4	4	5	5	5	4	4	5	4	4	4	4	4	4	4	4	4	4	4	4	4	4	4	4.2	4.25	4.2
50	0	3	5	3	3	3	2	4	4	4	5	5	4	4	4	5	5	4	4	4	4	5	5	4	5	5	5	5	4	4	5	5	4	4	4	4	4	4	4	4	4	4	4	4	4	4	4.4	4.25	4.2
51	0	3	5	3	3	3	3	4	4	4	5	5	4	4	4	5	5	4	4	4	4	5	5	4	5	5	5	5	4	4	5	5	4	4	4	4	4	4	4	4	4	4	4	4	4	4	4.4	4.25	4.2
52	1	3	5	3	3	3	2	4	4	4	5	5	4	4	4	5	5	4	4	4	4	5	5	4	5	5	5	5	4	4	5	5	4	4	4	4	4	4	4	4	4	4	4	4	4	4	4.4	4.25	4.2
53	1	3	5	3	3	3	1	4	4	4	5	5	5	4	4	5	5	4	4	4	4	5	5	4	5	5	5	5	4	4	5	5	4	4	4	4	4	4	4	4	4	4	4	4	4	4	4.4	4.5	4.2
54	1	2	5	3	3	3	4	4	4	4	5	5	5	4	4	5	5	4	4	4	4	5	5	4	5	5	5	5	4	4	5	4	4	4	4	4	4	4	4	4	4	4	4	4	4	4	4.4	4.5	4.2
55	1	2	5	3	3	3	4	4	4	4	5	5	5	4	4	5	5	4	4	4	4	5	5	4	5	5	5	5	4	4	5	5	4	4	4	4	4	4	4	4	4	4	4	4	4	4	4.4	4.5	4.2
56	1	2	5	3	3	3	4	4	4	4	5	5	5	4	4	5	5	4	4	4	4	4	5	4	5	5	5	5	4	4	5	5	4	4	4	4	4	4	4	4	4	4	4	4	4	4	4.4	4.5	4.2
57	0	1	5	3	3	3	1	4	4	4	5	5	5	4	4	5	5	4	4	4	4	4	5	4	5	5	5	5	4	4	5	5	4	4	4	4	4	4	4	4	4	4	4	4	4	4	4.4	4.5	4.2
58	0	1	4	3	3	3	2	4	4	5	5	5	5	4	4	5	5	4	4	4	4	4	5	4	5	5	5	5	4	4	5	5	4	4	4	4	4	4	4	4	4	4	4	4	4	4	4.6	4.5	4.2
59	0	2	4	3	3	3	2	4	4	4	5	5	5	4	4	5	5	4	4	4	4	4	5	4	5	5	5	5	4	4	5	4	4	4	4	4	4	4	4	4	4	4	4	4	4	4	4.4	4.5	4.2
60	0	2	4	3	3	3	3	5	4	4	5	5	5	4	4	5	5	4	4	5	4	4	5	4	5	5	5	5	4	4	5	5	4	4	4	4	4	4	4	4	4	5	4	4	4	4.25	4.6	4.5	4.4
61	0	2	4	3	3	3	3	4	4	4	5	4	5	4	4	5	5	4	4	4	4	4	5	4	5	5	5	5	4	4	5	5	4	4	4	4	4	4	4	4	4	4	4	4	4	4	4.2	4.5	4.2
62	0	2	3	3	3	3	3	5	4	4	5	4	5	4	4	5	5	4	4	5	4	4	5	5	5	5	5	5	4	4	5	5	4	4	4	4	4	4	4	4	4	5	4	4	4	4.25	4.4	4.5	4.4
63	0	2	4	3	3	3	2	4	4	4	5	5	5	4	4	5	5	4	4	4	4	4	5	5	5	5	5	5	4	4	5	4	4	4	4	4	4	4	4	4	4	4	4	4	4	4	4.4	4.5	4.2
64	0	2	4	3	3	3	2	5	4	4	5	5	5	4	4	5	5	4	4	5	4	4	5	5	5	5	5	5	4	4	5	5	4	4	4	4	4	4	4	4	4	5	4	4	4	4.25	4.6	4.5	4.4
65	0	2	4	3	3	3	1	4	4	4	5	5	5	4	4	5	5	4	4	4	4	4	5	5	5	5	5	5	4	4	5	5	4	4	4	4	4	4	4	4	4	4	4	4	4	4	4.4	4.5	4.2
66	0	1	3	3	3	3	2	5	4	4	5	5	5	4	4	5	5	4	4	5	4	4	5	5	5	5	5	5	4	4	5	5	4	4	4	4	4	4	4	4	4	5	4	4	4	4.25	4.6	4.5	4.4
67	0	1	4	3	3	3	3	4	4	4	5	5	5	4	4	5	5	4	4	4	4	4	5	5	5	5	5	5	4	4	5	4	4	4	4	4	4	4	4	4	4	4	4	4	4	4	4.4	4.5	4.2
68	0	1	4	3	3	3	2	4	4	4	5	5	5	4	4	5	5	4	4	4	4	4	5	5	5	5	5	5	4	4	5	5	4	4	4	4	4	4	4	4	4	4	4	4	4	4	4.4	4.5	4.2
69	0	2	3	3	3	3	2	5	4	4	5	5	5	4	4	5	5	4	4	5	4	4	5	5	5	5	5	5	4	4	5	5	4	4	4	4	4	4	4	4	4	5	4	4	4	4.25	4.6	4.5	4.4
70	0	2	4	3	3	3	2	5	4	4	5	5	5	4	4	5	5	4	4	5	4	4	5	5	5	5	5	5	4	4	5	5	4	4	4	4	4	4	4	4	4	5	4	4	4	4.25	4.6	4.5	4.4
71	0	4	4	3	3	3	1	5	4	4	5	5	5	4	4	5	5	4	4	5	4	4	5	5	5	5	5	5	4	4	5	4	4	4	4	4	4	4	4	4	4	5	4	4	4	4.25	4.6	4.5	4.4
72	0	4	3	3	3	3	3	5	4	4	5	5	5	4	4	5	5	4	4	5	4	4	4	5	5	5	5	5	4	4	5	5	4	4	4	4	4	4	4	4	4	5	4	4	4	4.25	4.6	4.5	4.4
73	0	4	4	3	3	3	3	5	4	4	5	5	5	4	4	5	5	4	4	5	4	4	4	5	5	5	5	5	4	4	5	5	4	4	4	4	4	4	4	4	4	5	4	4	4	4.25	4.6	4.5	4.4
74	0	3	3	3	3	3	3	5	4	4	5	5	5	4	4	5	5	4	4	5	4	4	4	5	5	5	5	5	4	4	5	5	4	4	4	4	4	4	4	4	4	5	4	4	4	4.25	4.6	4.5	4.4
75	0	3	4	3	3	3	2	5	4	4	4	5	5	4	4	5	5	4	4	5	4	4	4	4	5	5	5	5	4	4	5	4	4	4	4	4	4	4	4	4	4	5	4	4	4	4.25	4.4	4.5	4.4
76	0	4	3	3	3	3	2	5	4	5	4	5	5	4	4	5	5	4	4	5	4	4	4	4	5	5	5	5	4	4	5	5	4	4	4	4	4	4	4	4	4	5	4	4	4	4.25	4.6	4.5	4.4
78	0	5	4	3	3	3	1	4	4	5	4	5	5	4	4	5	5	4	4	4	4	5	4	4	5	5	5	5	4	4	5	5	4	4	4	4	4	4	4	4	4	4	4	4	4	4	4.4	4.5	4.2
79	1	2	4	3	3	3	4	4	4	5	4	5	5	4	4	5	5	4	4	4	4	5	4	4	5	5	5	5	4	4	5	5	4	4	4	4	4	4	4	4	4	4	4	4	4	4	4.4	4.5	4.2
80	1	3	5	3	3	3	4	4	4	5	4	5	5	4	4	5	5	4	4	4	4	4	4	4	5	5	5	5	4	4	5	4	4	4	4	4	4	4	4	4	4	4	4	4	4	4	4.4	4.5	4.2
81	0	2	4	3	3	3	1	4	4	5	5	5	5	4	4	5	5	4	4	4	4	4	4	4	5	5	5	5	4	4	5	5	4	4	4	4	4	4	4	4	4	4	4	4	4	4	4.6	4.5	4.2
82	0	2	4	3	3	3	2	4	5	5	5	5	5	4	4	5	5	4	5	4	5	4	4	4	5	5	5	5	5	4	5	5	5	4	4	4	4	4	4	4	4	4	5	4	4	4.25	4.8	4.5	4.6
83	1	3	4	3	3	3	3	4	5	5	5	5	5	4	4	5	5	4	5	4	5	4	4	4	5	5	5	5	5	4	5	5	5	4	4	4	4	4	4	4	4	4	5	4	4	4.25	4.8	4.5	4.6
84	1	3	4	3	3	3	4	4	5	5	5	5	5	4	5	5	5	4	5	4	5	4	4	4	5	5	5	5	5	4	5	4	5	4	5	4	4	5	5	5	4	4	5	4	5	4.5	4.8	4.75	4.6
85	0	3	4	3	3	3	3	4	5	5	5	5	5	4	5	5	5	4	5	4	5	4	4	4	5	5	5	5	5	4	5	5	5	4	5	4	4	5	5	5	4	4	5	4	5	4.5	4.8	4.75	4.6
86	1	3	4	3	3	3	1	4	5	5	5	5	5	4	5	5	5	4	5	4	5	4	4	4	5	5	5	5	5	4	5	5	5	4	5	4	4	5	5	5	4	4	5	4	5	4.5	4.8	4.75	4.6
87	0	3	5	3	3	3	2	4	5	5	5	5	5	4	4	5	5	4	5	4	5	4	4	4	5	5	5	5	5	4	5	5	5	4	4	4	4	4	4	4	4	4	5	4	4	4.25	4.8	4.5	4.6
88	0	4	5	3	3	3	3	4	5	5	5	5	5	4	4	5	5	4	5	4	5	4	4	4	5	5	5	5	5	4	5	4	5	4	4	4	4	4	4	4	4	4	5	4	4	4.25	4.8	4.5	4.6
89	0	4	5	3	3	3	4	4	5	4	5	5	5	4	4	5	5	4	5	4	5	4	4	4	5	5	5	5	5	4	5	5	5	4	4	4	4	4	4	4	4	4	5	4	4	4.25	4.6	4.5	4.6
90	0	4	5	3	3	3	1	4	5	4	5	5	5	4	4	5	5	4	5	4	5	4	4	4	5	5	5	5	5	4	5	5	5	4	4	4	4	4	4	4	4	4	5	4	4	4.25	4.6	4.5	4.6
91	0	4	5	3	3	3	2	4	5	4	5	5	5	4	4	5	5	4	5	4	5	4	4	4	5	5	5	5	5	4	5	5	5	4	4	4	4	4	4	4	4	4	5	4	4	4.25	4.6	4.5	4.6
92	0	4	3	3	3	3	3	4	5	4	5	5	5	4	4	5	5	4	5	4	5	4	4	4	5	5	5	5	5	4	5	4	5	4	4	4	4	4	4	4	4	4	5	4	4	4.25	4.6	4.5	4.6
93	0	5	2	3	3	3	4	4	4	4	5	4	5	4	4	5	5	4	4	4	4	4	4	4	5	5	5	5	4	4	5	5	4	4	4	4	4	4	4	4	4	4	4	4	4	4	4.2	4.5	4.2
94	0	2	5	3	3	3	3	4	4	4	5	4	5	4	4	5	5	4	4	4	4	4	4	4	5	5	5	5	4	4	5	5	4	4	4	4	4	4	4	4	4	4	4	4	4	4	4.2	4.5	4.2
95	0	2	5	3	3	3	2	4	4	4	5	4	5	4	4	5	5	4	4	4	4	4	4	4	5	5	5	5	4	4	5	5	4	4	4	4	4	4	4	4	4	4	4	4	4	4	4.2	4.5	4.2
96	1	2	5	3	3	3	1	4	4	4	5	4	5	4	4	5	5	4	4	4	4	4	4	4	5	4	5	5	4	4	5	4	4	4	4	4	4	4	4	4	4	4	4	4	4	4	4.2	4.5	4.2
97	0	2	5	3	3	3	2	4	4	4	5	4	5	4	4	5	5	4	4	4	4	4	4	4	5	4	5	5	4	4	5	5	4	4	4	4	4	4	4	4	4	4	4	4	4	4	4.2	4.5	4.2
98	0	2	5	3	3	3	3	4	4	4	5	4	5	4	4	5	5	4	4	4	4	4	4	4	5	4	5	5	4	4	5	5	4	4	4	4	4	4	4	4	4	4	4	4	4	4	4.2	4.5	4.2
99	1	3	5	3	3	3	1	4	4	4	5	4	5	4	4	4	5	5	4	4	4	4	4	4	5	4	5	5	4	4	5	5	4	4	4	4	4	4	4	4	4	4	4	4	4	4	4.2	4.25	4.4
100	1	3	5	3	3	3	1	5	4	4	5	5	5	4	4	4	5	5	4	5	4	4	4	4	5	4	5	5	4	4	5	4	4	4	4	4	4	4	4	4	4	5	4	4	4	4.25	4.6	4.25	4.6
101	1	3	5	3	3	3	1	5	4	4	5	5	5	4	4	4	5	5	4	5	4	4	4	4	5	4	5	5	4	4	5	5	4	4	4	4	4	4	4	4	4	5	4	4	4	4.25	4.6	4.25	4.6
102	0	4	5	3	3	3	1	5	4	4	5	5	5	4	4	4	5	4	4	5	4	4	4	4	5	4	5	5	4	4	5	5	4	4	4	4	4	4	4	4	4	5	4	4	4	4.25	4.6	4.25	4.4
103	0	4	5	3	3	4	4	4	4	4	5	5	5	4	4	4	5	4	4	4	4	4	4	4	5	4	5	5	4	4	5	5	4	4	4	4	4	4	4	4	4	4	4	4	4	4	4.4	4.25	4.2
104	0	4	5	4	3	4	4	4	4	4	5	5	5	4	4	4	5	4	4	4	4	4	4	4	5	4	5	5	4	4	5	5	4	4	4	4	4	4	4	4	4	4	4	4	4	4	4.4	4.25	4.2
105	0	2	5	4	3	4	4	4	4	4	5	5	5	4	4	4	5	4	4	4	4	4	4	4	5	4	5	5	4	4	5	5	4	4	4	4	4	4	4	4	4	4	4	4	4	4	4.4	4.25	4.2
106	0	2	3	4	3	4	4	4	4	4	5	5	5	4	4	4	5	4	4	4	4	4	4	4	5	4	5	5	4	4	5	5	4	4	4	4	4	4	4	4	4	4	4	4	4	4	4.4	4.25	4.2
107	1	2	5	4	3	4	4	4	4	4	5	5	5	4	4	4	5	4	4	4	4	4	4	4	5	4	5	5	4	4	5	4	4	4	4	4	4	4	4	4	4	4	4	4	4	4	4.4	4.25	4.2
108	1	5	5	4	3	4	4	4	4	4	5	5	5	4	4	4	5	4	4	4	4	4	4	4	5	4	5	5	4	4	5	5	4	4	4	4	4	4	4	4	4	4	4	4	4	4	4.4	4.25	4.2
109	1	3	5	4	3	4	4	4	4	4	5	5	5	4	4	4	5	4	4	4	4	4	4	4	5	4	5	5	4	4	5	5	4	4	4	4	4	4	4	4	4	4	4	4	4	4	4.4	4.25	4.2
110	1	3	3	4	3	4	3	4	4	4	5	5	5	4	4	4	5	4	4	4	4	5	4	4	5	4	5	5	4	4	5	4	4	4	4	4	4	4	4	4	4	4	4	4	4	4	4.4	4.25	4.2
111	0	3	3	4	3	4	3	4	4	4	5	5	5	4	4	4	4	4	4	4	4	5	4	4	5	4	5	5	4	4	5	5	4	4	4	4	4	4	4	4	4	4	4	4	4	4	4.4	4.25	4
112	0	3	5	3	3	4	3	4	4	4	5	5	4	4	4	4	4	4	4	4	4	5	4	4	5	4	5	5	4	4	5	4	4	4	4	4	4	4	4	4	4	4	4	4	4	4	4.4	4	4
113	0	3	3	3	3	4	3	4	4	4	5	5	4	4	4	4	4	4	4	4	4	5	4	4	5	4	5	5	4	4	5	4	4	4	4	4	4	4	4	4	4	4	4	4	4	4	4.4	4	4
114	0	2	3	3	3	4	2	4	4	4	5	5	4	4	4	4	4	4	4	4	4	5	4	4	5	4	5	5	4	4	5	4	4	4	4	4	4	4	4	4	4	4	4	4	4	4	4.4	4	4
115	0	2	3	3	3	4	4	4	4	4	5	4	4	4	5	4	4	4	4	4	4	5	4	4	5	4	5	5	4	4	5	4	4	4	5	4	4	5	5	5	4	4	4	4	5	4.25	4.2	4.25	4
116	0	2	3	3	3	4	4	4	4	4	5	4	4	4	5	4	4	4	4	4	4	5	4	4	5	4	5	5	4	4	5	4	4	4	5	4	4	5	5	5	4	4	4	4	5	4.25	4.2	4.25	4
117	0	2	3	3	3	4	4	5	4	4	5	4	5	4	5	4	4	4	4	5	4	5	4	4	5	4	5	5	4	4	5	4	4	4	5	4	4	5	5	5	4	5	4	4	5	4.5	4.4	4.5	4.2
118	1	2	3	3	3	4	4	5	4	4	5	4	5	4	5	4	4	4	4	5	4	5	4	4	5	4	5	5	4	4	5	5	4	4	5	4	4	5	5	5	4	5	4	4	5	4.5	4.4	4.5	4.2
119	1	2	3	3	3	4	2	5	4	4	5	4	5	4	5	4	4	4	4	5	4	5	4	4	5	4	5	5	4	4	5	5	4	4	5	4	4	5	5	5	4	5	4	4	5	4.5	4.4	4.5	4.2
120	1	4	5	3	3	4	2	5	4	4	5	4	5	4	5	4	4	4	4	5	4	5	4	4	5	4	5	5	4	4	5	5	4	4	5	4	4	5	5	5	4	5	4	4	5	4.5	4.4	4.5	4.2
121	0	4	5	3	3	4	1	5	4	4	5	4	5	4	5	4	4	4	4	5	4	5	4	4	5	4	5	5	4	4	5	5	4	4	5	4	4	5	5	5	4	5	4	4	5	4.5	4.4	4.5	4.2
122	0	4	5	3	3	4	1	5	4	4	5	4	5	4	5	4	4	4	4	5	4	5	4	4	5	4	5	5	4	4	5	5	4	4	5	4	4	5	5	5	4	5	4	4	5	4.5	4.4	4.5	4.2
123	0	4	5	3	3	4	1	4	4	4	5	4	4	4	5	4	4	4	4	4	4	5	5	4	5	4	5	5	4	4	5	4	4	4	5	4	4	5	5	5	4	4	4	4	5	4.25	4.2	4.25	4
124	0	4	5	3	3	4	3	4	4	4	5	4	4	4	5	4	4	4	4	4	4	5	5	4	5	4	5	5	4	4	5	4	4	4	5	4	4	5	5	5	4	4	4	4	5	4.25	4.2	4.25	4
125	0	4	5	3	3	4	3	4	4	4	5	4	4	4	5	4	4	4	4	4	4	5	5	4	5	4	5	5	4	4	5	4	4	4	5	4	4	5	5	5	4	4	4	4	5	4.25	4.2	4.25	4
126	0	3	5	3	3	4	3	3	4	4	5	4	4	4	5	4	4	4	4	3	4	5	5	4	5	4	5	5	4	4	5	5	4	4	5	4	4	5	5	5	4	3	4	4	5	4	4	4.25	3.8
127	0	3	5	3	3	4	2	3	4	4	5	4	4	4	5	4	4	4	4	3	4	5	5	4	5	4	5	5	4	4	5	4	4	4	5	4	4	5	5	5	4	3	4	4	5	4	4	4.25	3.8
128	0	3	5	3	3	4	1	3	4	4	5	4	4	4	5	4	4	4	4	3	4	5	5	4	5	4	5	5	4	4	5	4	4	4	5	4	4	5	5	5	4	3	4	4	5	4	4	4.25	3.8
129	0	3	5	3	3	4	1	3	4	4	5	4	4	4	5	4	4	4	4	3	4	4	5	4	5	4	5	5	4	4	5	4	4	4	5	4	4	5	5	5	4	3	4	4	5	4	4	4.25	3.8
130	0	3	5	4	3	4	2	3	4	4	5	4	4	4	5	4	4	4	4	3	4	4	5	4	5	4	5	5	4	4	5	4	4	4	5	4	4	5	5	5	4	3	4	4	5	4	4	4.25	3.8
131	0	3	5	4	3	4	3	3	4	4	5	4	4	4	5	4	4	4	4	3	4	4	5	4	5	4	5	5	4	4	5	4	4	4	5	4	4	5	5	5	4	3	4	4	5	4	4	4.25	3.8
132	1	3	5	4	3	4	2	3	4	4	5	4	4	4	5	4	4	4	4	3	4	4	5	4	5	4	5	5	4	4	5	4	4	4	5	4	4	5	5	5	4	3	4	4	5	4	4	4.25	3.8
133	1	3	4	4	3	4	1	3	4	4	5	4	4	4	5	4	4	4	4	3	4	4	5	4	5	4	5	5	4	4	5	4	4	4	5	4	4	5	5	5	4	3	4	4	5	4	4	4.25	3.8
134	1	2	4	4	3	4	4	4	4	4	5	4	4	4	5	4	4	4	4	4	4	4	5	4	5	4	5	5	4	4	5	4	4	4	5	4	4	5	5	5	4	4	4	4	5	4.25	4.2	4.25	4
135	1	2	4	4	3	4	4	4	5	4	5	5	4	4	5	4	4	4	5	4	5	4	5	4	5	4	5	5	5	4	5	4	5	4	5	4	4	5	5	5	4	4	5	4	5	4.5	4.6	4.25	4.4
136	1	2	4	4	3	4	4	4	5	4	4	5	4	4	5	4	4	4	5	4	5	4	5	4	5	4	5	5	5	4	5	5	5	4	5	4	4	5	5	5	4	4	5	4	5	4.5	4.4	4.25	4.4
137	0	1	4	4	3	4	1	4	5	4	4	5	4	4	5	4	4	4	5	4	5	4	5	4	5	4	5	5	5	4	5	5	5	4	5	4	4	5	5	5	4	4	5	4	5	4.5	4.4	4.25	4.4
138	0	1	4	4	3	4	2	4	5	4	5	5	4	4	5	4	4	4	5	4	5	4	5	4	5	4	5	5	5	4	5	5	5	4	5	4	4	5	5	5	4	4	5	4	5	4.5	4.6	4.25	4.4
139	0	2	4	4	3	4	2	4	5	4	4	5	4	4	5	4	4	4	5	4	5	4	5	4	5	4	5	5	5	4	5	5	5	4	5	4	4	5	5	5	4	4	5	4	5	4.5	4.4	4.25	4.4
140	0	2	4	4	3	4	3	4	5	4	5	5	4	4	5	4	4	4	5	4	5	5	5	4	5	4	5	5	5	4	5	5	5	4	5	4	4	5	5	5	4	4	5	4	5	4.5	4.6	4.25	4.4
141	0	2	4	4	3	4	3	4	5	4	4	5	4	4	5	4	4	4	5	4	5	5	5	4	5	4	5	5	5	4	5	5	5	4	5	4	4	5	5	5	4	4	5	4	5	4.5	4.4	4.25	4.4
142	0	2	4	4	3	4	3	4	5	4	4	5	4	4	5	4	4	4	5	4	5	5	5	4	5	4	5	5	5	4	5	5	5	4	5	4	4	5	5	5	4	4	5	4	5	4.5	4.4	4.25	4.4
143	0	2	4	4	3	4	2	5	5	4	4	5	5	4	5	4	4	4	5	5	5	5	5	4	5	4	5	5	5	4	5	5	5	4	5	4	4	5	5	5	4	5	5	4	5	4.75	4.6	4.5	4.6
144	0	2	4	4	3	4	2	5	5	4	4	5	5	4	5	4	4	4	5	5	5	5	5	4	5	4	5	5	5	4	5	5	5	4	5	4	4	5	5	5	4	5	5	4	5	4.75	4.6	4.5	4.6
145	0	2	4	4	3	4	1	5	5	4	4	5	5	4	5	4	4	4	5	5	5	5	5	4	5	4	5	5	5	4	5	5	5	4	5	4	4	5	5	5	4	5	5	4	5	4.75	4.6	4.5	4.6
146	0	1	4	4	3	4	2	5	5	4	4	5	5	4	5	5	4	4	5	5	5	5	5	4	5	4	5	5	5	4	5	5	5	4	5	4	4	5	5	5	4	5	5	4	5	4.75	4.6	4.75	4.6
147	0	1	4	4	3	4	3	5	5	4	4	5	5	4	5	5	4	4	5	5	5	5	5	4	5	4	5	5	5	4	5	5	5	4	5	4	4	5	5	5	4	5	5	4	5	4.75	4.6	4.75	4.6
148	0	1	4	4	3	4	2	5	5	4	4	5	5	4	5	5	4	4	5	5	5	5	5	4	5	4	5	5	5	4	5	5	5	4	5	4	4	5	5	5	4	5	5	4	5	4.75	4.6	4.75	4.6
149	0	2	4	4	3	4	2	5	5	4	4	5	5	4	5	5	4	4	5	5	5	5	5	4	5	4	5	5	5	4	5	5	5	4	5	4	4	5	5	5	4	5	5	4	5	4.75	4.6	4.75	4.6
150	0	2	4	4	3	4	2	5	5	4	5	5	5	4	5	5	4	4	5	5	5	5	5	4	5	4	5	5	5	4	5	5	5	4	5	4	4	5	5	5	4	5	5	4	5	4.75	4.8	4.75	4.6
151	0	4	4	4	3	4	1	5	4	4	5	4	5	4	5	5	4	4	4	5	4	5	5	4	5	4	5	5	4	4	5	5	4	4	5	4	4	5	5	5	4	5	4	4	5	4.5	4.4	4.75	4.2
152	0	4	3	4	3	4	3	4	4	4	5	4	4	4	4	5	4	4	4	4	4	5	5	4	5	4	5	5	4	4	5	5	4	4	4	4	4	4	4	4	4	4	4	4	4	4	4.2	4.25	4
153	0	4	4	4	3	4	3	4	4	4	5	4	4	4	4	5	4	4	4	4	4	5	5	4	5	4	5	5	4	4	5	5	4	4	4	4	4	4	4	4	4	4	4	4	4	4	4.2	4.25	4
154	0	3	3	4	3	4	3	4	4	4	4	4	4	4	4	5	4	4	4	4	4	5	5	4	5	4	5	5	4	4	5	5	4	4	4	4	4	4	4	4	4	4	4	4	4	4	4	4.25	4
155	0	3	4	4	3	4	2	4	4	4	4	4	4	4	4	5	4	4	4	4	4	4	5	4	5	4	5	5	4	4	5	5	4	4	4	4	4	4	4	4	4	4	4	4	4	4	4	4.25	4
156	0	4	3	4	3	4	2	4	4	4	4	4	4	4	4	5	4	4	4	4	4	4	5	4	5	4	5	5	4	4	5	5	4	4	4	4	4	4	4	4	4	4	4	4	4	4	4	4.25	4
157	0	5	4	4	3	4	1	4	5	4	4	5	4	4	4	5	4	4	5	4	5	4	5	4	5	4	5	5	5	4	5	5	5	4	4	4	4	4	4	4	4	4	5	4	4	4.25	4.4	4.25	4.4
158	1	2	4	4	3	4	4	4	5	4	4	5	4	4	4	5	4	4	5	4	5	4	5	4	5	4	5	5	5	4	5	5	5	4	4	4	4	4	4	4	4	4	5	4	4	4.25	4.4	4.25	4.4
159	1	3	3	4	3	4	4	4	5	4	4	5	4	4	4	5	4	4	5	4	5	4	5	4	5	4	5	5	5	4	5	5	5	4	4	4	4	4	4	4	4	4	5	4	4	4.25	4.4	4.25	4.4
160	0	2	4	4	3	4	1	4	5	4	5	5	4	4	5	5	4	4	5	4	5	4	5	4	5	4	5	5	5	4	5	5	5	4	5	4	4	5	5	5	4	4	5	4	5	4.5	4.6	4.5	4.4
161	0	2	3	4	3	4	2	4	5	4	5	5	4	4	5	5	4	5	5	4	5	4	5	4	5	4	5	5	5	4	5	5	5	4	5	4	4	5	5	5	4	4	5	4	5	4.5	4.6	4.5	4.6
162	1	3	4	3	3	4	3	4	5	4	5	5	4	4	5	5	4	5	5	4	5	4	5	4	5	4	5	5	5	4	5	5	5	4	5	4	4	5	5	5	4	4	5	4	5	4.5	4.6	4.5	4.6
163	1	3	3	3	3	4	4	4	5	4	5	5	4	4	5	5	4	5	5	4	5	4	5	4	5	4	5	5	5	4	5	4	5	4	5	4	4	5	5	5	4	4	5	4	5	4.5	4.6	4.5	4.6
164	0	3	4	3	3	4	3	4	5	4	5	5	4	4	5	5	4	5	5	4	5	4	5	4	5	4	5	5	5	4	5	4	5	4	5	4	4	5	5	5	4	4	5	4	5	4.5	4.6	4.5	4.6
165	1	3	3	3	3	4	1	4	4	4	5	4	4	4	5	5	4	5	4	4	4	4	5	4	5	4	5	5	4	4	5	4	4	4	5	4	4	5	5	5	4	4	4	4	5	4.25	4.2	4.5	4.2
166	0	3	4	3	3	4	2	4	4	4	5	4	4	4	5	5	4	5	4	4	4	4	5	4	5	4	5	5	4	4	5	4	4	4	5	4	4	5	5	5	4	4	4	4	5	4.25	4.2	4.5	4.2
167	0	4	4	3	3	4	3	4	4	4	5	4	4	4	5	5	4	5	4	4	4	4	5	4	5	4	5	5	4	4	5	4	4	4	5	4	4	5	5	5	4	4	4	4	5	4.25	4.2	4.5	4.2
168	0	4	3	3	3	4	4	4	4	4	5	4	4	4	5	5	4	5	4	4	4	4	5	4	5	4	5	5	4	4	5	4	4	4	5	4	4	5	5	5	4	4	4	4	5	4.25	4.2	4.5	4.2
169	0	4	4	3	3	4	1	4	4	4	5	4	4	4	5	5	4	5	4	4	4	4	5	4	5	4	5	5	4	4	5	4	4	4	5	4	4	5	5	5	4	4	4	4	5	4.25	4.2	4.5	4.2
170	0	4	4	3	3	4	2	5	5	4	5	5	5	4	5	5	4	5	5	5	5	4	5	4	5	4	5	5	5	4	5	4	5	4	5	4	4	5	5	5	4	5	5	4	5	4.75	4.8	4.75	4.8
171	0	4	3	3	3	1	3	4	4	4	5	4	5	4	5	5	4	5	4	4	4	4	5	4	5	4	5	5	4	4	5	4	4	4	5	4	4	5	5	5	4	4	4	4	5	4.25	4.2	4.75	4.2
172	0	5	4	3	3	1	4	4	5	3	5	5	5	3	5	5	4	5	5	4	5	4	5	4	5	4	5	5	5	3	5	4	5	3	5	4	3	5	5	5	4	4	5	3	5	4.25	4.4	4.5	4.6
173	0	2	3	3	3	4	3	4	4	3	4	4	5	3	5	5	4	5	4	4	4	4	5	4	5	4	5	5	4	3	5	4	4	3	5	4	3	5	5	5	4	4	4	3	5	4	3.8	4.5	4.2
174	0	2	5	3	3	4	2	4	4	3	4	4	5	3	5	5	4	5	4	4	4	4	5	4	5	4	5	5	4	3	5	5	4	3	5	4	3	5	5	5	4	4	4	3	5	4	3.8	4.5	4.2
175	1	2	5	3	3	4	1	4	5	3	4	5	5	3	5	5	4	5	5	4	5	4	5	4	5	4	5	5	5	3	5	5	5	3	5	4	3	5	5	5	4	4	5	3	5	4.25	4.2	4.5	4.6
176	0	2	5	3	3	4	2	5	5	3	4	5	5	3	5	5	4	5	5	5	5	4	5	4	5	4	5	5	5	3	5	5	5	3	5	4	3	5	5	5	4	5	5	3	5	4.5	4.4	4.5	4.8
177	0	2	3	3	3	4	3	4	5	5	4	5	5	5	5	5	4	5	5	4	5	4	5	4	5	4	5	5	5	5	5	5	5	5	5	4	5	5	5	5	4	4	5	5	5	4.75	4.6	5	4.6
178	1	3	4	3	3	4	1	5	5	5	4	5	5	5	4	5	4	5	5	5	5	4	5	4	5	4	5	5	5	5	5	5	5	5	4	4	5	4	4	4	4	5	5	5	4	4.75	4.8	4.75	4.8
179	1	3	4	3	3	4	1	4	5	5	4	5	5	5	4	4	5	5	5	4	5	4	5	4	5	4	5	5	5	5	5	5	5	5	4	5	5	4	4	4	4	4	5	5	4	4.5	4.6	4.5	4.8
180	1	3	3	3	3	2	1	4	5	5	4	5	5	5	5	5	5	5	5	4	5	4	5	4	5	4	5	5	5	5	5	5	5	5	5	5	5	5	5	5	4	4	5	5	5	4.75	4.6	5	4.8
181	0	4	4	4	3	3	1	5	5	5	4	5	5	5	5	5	5	4	5	5	5	4	5	4	5	5	5	5	5	5	5	5	5	5	5	5	5	5	5	5	4	5	5	5	5	5	4.8	5	4.8
182	0	4	4	4	3	3	4	5	5	4	4	5	5	4	5	4	5	4	5	5	5	4	5	4	5	5	5	5	5	4	5	5	5	4	5	5	4	5	5	5	4	5	5	4	5	4.75	4.6	4.5	4.8
183	0	4	3	4	3	3	4	5	5	4	4	5	5	4	5	4	5	4	5	5	5	4	5	4	5	5	5	5	5	4	5	5	5	4	5	5	4	5	5	5	4	5	5	4	5	4.75	4.6	4.5	4.8
184	0	2	4	4	3	3	4	5	4	4	4	4	5	4	5	4	5	4	4	5	4	4	5	4	4	5	5	5	4	4	5	5	4	4	5	5	4	5	5	5	4	5	4	4	5	4.5	4.2	4.5	4.4
185	0	2	3	4	3	3	4	4	4	4	4	4	5	4	5	4	5	4	4	4	4	4	5	4	4	5	5	5	4	4	5	5	4	4	5	5	4	5	5	5	4	4	4	4	5	4.25	4	4.5	4.2
186	1	2	4	4	3	3	4	4	4	4	4	4	5	4	5	4	5	4	4	4	4	4	5	4	4	5	5	5	4	4	5	5	4	4	5	5	4	5	5	5	4	4	4	4	5	4.25	4	4.5	4.2
187	1	5	3	4	3	2	4	4	4	4	4	4	4	4	5	4	5	4	4	4	4	4	5	4	4	5	5	5	4	4	5	4	4	4	5	5	4	5	5	5	4	4	4	4	5	4.25	4	4.25	4.2
188	1	3	4	4	3	2	4	4	4	4	4	4	4	4	5	4	5	4	4	4	4	4	5	4	4	5	5	5	4	4	5	4	4	4	5	5	4	5	5	5	4	4	4	4	5	4.25	4	4.25	4.2
189	1	3	4	4	3	2	3	4	4	4	4	4	4	4	5	4	5	4	4	4	4	5	5	4	4	5	5	5	4	4	5	4	4	4	5	5	4	5	5	5	4	4	4	4	5	4.25	4	4.25	4.2
190	0	3	3	4	3	2	3	4	5	4	4	5	4	4	5	4	5	4	5	4	5	5	5	4	4	5	5	5	5	4	5	4	5	4	5	5	4	5	5	5	4	4	5	4	5	4.5	4.4	4.25	4.6
191	0	3	4	4	3	4	3	4	5	4	4	5	4	4	5	4	5	4	5	4	5	5	5	4	4	5	5	5	5	4	5	4	5	4	5	5	4	5	5	5	4	4	5	4	5	4.5	4.4	4.25	4.6
192	0	3	4	4	3	4	3	4	5	4	4	5	4	4	5	4	5	4	5	4	5	5	5	4	4	5	5	5	5	4	5	4	5	4	5	5	4	5	5	5	4	4	5	4	5	4.5	4.4	4.25	4.6
193	0	2	3	3	3	4	2	4	5	4	4	5	4	4	5	4	5	4	5	4	5	5	5	4	4	5	5	5	5	4	5	4	5	4	5	5	4	5	5	5	4	4	5	4	5	4.5	4.4	4.25	4.6
194	0	2	4	3	3	4	4	4	5	4	4	5	4	4	5	4	5	4	5	4	5	5	5	4	4	5	5	5	5	4	5	4	5	4	5	5	4	5	5	5	4	4	5	4	5	4.5	4.4	4.25	4.6
195	0	2	4	3	3	4	4	4	5	4	4	5	4	4	5	4	5	4	5	4	5	5	5	4	4	5	5	5	5	4	5	4	5	4	5	5	4	5	5	5	4	4	5	4	5	4.5	4.4	4.25	4.6
196	0	2	3	3	3	4	4	4	5	4	4	5	4	4	4	4	5	4	5	4	5	5	5	4	4	5	5	5	5	4	5	4	5	4	4	5	4	4	4	4	4	4	5	4	4	4.25	4.4	4	4.6
197	1	2	4	3	3	4	4	4	5	4	4	5	4	4	4	4	5	4	5	4	5	5	5	4	4	5	5	5	5	4	5	4	5	4	4	5	4	4	4	4	4	4	5	4	4	4.25	4.4	4	4.6
198	1	2	4	3	3	4	2	4	4	4	4	4	4	4	4	4	5	4	4	4	4	5	5	4	4	5	5	5	4	4	5	4	4	4	4	5	4	4	4	4	4	4	4	4	4	4	4	4	4.2
199	1	4	3	3	3	4	2	4	4	3	4	4	4	3	4	4	5	4	4	4	4	5	4	4	4	5	5	5	4	3	5	4	4	3	4	5	3	4	4	4	4	4	4	3	4	3.75	3.8	3.75	4.2
200	0	4	4	3	3	4	1	5	4	3	4	4	5	3	4	4	5	4	4	5	4	5	4	4	4	5	5	5	4	3	5	4	4	3	4	5	3	4	4	4	4	5	4	3	4	4	4	4	4.4
201	0	4	3	3	3	4	1	5	4	5	4	4	5	5	4	4	5	5	4	5	4	5	4	4	4	5	5	5	4	5	5	4	4	5	4	5	5	4	4	4	4	5	4	5	4	4.5	4.4	4.5	4.6
202	0	4	4	3	3	4	1	5	4	5	4	4	5	5	5	5	5	5	4	5	4	5	4	4	4	5	5	5	4	5	5	4	4	5	5	5	5	5	5	5	4	5	4	5	5	4.75	4.4	5	4.6
203	0	4	4	3	3	4	3	5	5	5	4	5	5	5	5	5	5	5	5	5	5	5	4	4	4	5	5	5	5	5	5	4	5	5	5	5	5	5	5	5	4	5	5	5	5	5	4.8	5	5
204	0	4	4	2	3	4	3	5	5	5	4	5	5	5	5	5	5	5	5	5	5	5	4	4	4	5	5	5	5	5	5	4	5	5	5	5	5	5	5	5	4	5	5	5	5	5	4.8	5	5
205	0	3	4	2	3	4	3	5	5	5	4	5	5	5	5	5	5	5	5	5	5	5	4	4	4	5	5	5	5	5	5	4	5	5	5	5	5	5	5	5	4	5	5	5	5	5	4.8	5	5
206	0	3	4	2	3	4	2	5	5	5	4	5	5	5	5	5	5	5	5	5	5	5	4	4	4	5	5	5	5	5	5	4	5	5	5	5	5	5	5	5	4	5	5	5	5	5	4.8	5	5
207	0	3	4	2	3	4	1	5	5	5	4	5	5	5	5	5	5	5	5	5	5	4	4	4	4	5	5	5	5	5	5	4	5	5	5	5	5	5	5	5	4	5	5	5	5	5	4.8	5	5
208	0	3	4	2	3	4	1	5	4	5	4	4	5	5	5	5	5	5	4	5	4	4	4	4	4	5	5	5	4	5	5	5	4	5	5	5	5	5	5	5	4	5	4	5	5	4.75	4.4	5	4.6
209	0	3	4	2	3	4	2	5	4	5	4	4	5	5	5	5	5	5	4	5	4	4	4	4	4	5	5	5	4	5	5	5	4	5	5	5	5	5	5	5	5	5	4	5	5	4.75	4.4	5	4.6
210	0	3	4	2	3	4	3	5	4	5	4	4	5	5	4	5	5	5	4	5	4	4	4	4	4	5	5	5	4	5	5	5	4	5	4	5	5	4	4	4	5	5	4	5	4	4.5	4.4	4.75	4.6
211	1	3	4	2	3	4	2	5	4	5	4	4	5	5	4	5	5	5	4	5	4	4	4	4	4	5	5	5	4	5	5	5	4	5	4	5	5	4	4	4	5	5	4	5	4	4.5	4.4	4.75	4.6
212	1	3	4	2	3	4	1	5	4	5	4	4	5	5	4	5	5	5	4	5	4	4	4	4	4	5	5	5	4	5	5	5	4	5	4	5	5	4	4	4	5	5	4	5	4	4.5	4.4	4.75	4.6
21	1	2	4	4	3	4	4	5	4	5	4	4	5	5	4	5	5	5	4	5	4	4	4	4	4	5	5	5	4	5	5	5	4	5	4	5	5	4	4	4	5	5	4	5	4	4.5	4.4	4.75	4.6
214	1	2	4	4	3	4	4	5	4	5	4	4	5	5	4	5	5	5	4	5	4	4	4	4	4	5	5	5	4	5	5	5	4	5	4	5	5	4	4	4	5	5	4	5	4	4.5	4.4	4.75	4.6
215	1	2	4	4	3	4	4	5	4	5	4	4	5	5	5	5	5	5	4	5	4	4	4	4	4	5	5	5	4	5	5	5	4	5	5	5	5	5	5	5	5	5	4	5	5	4.75	4.4	5	4.6
216	0	1	4	4	3	4	1	5	4	5	4	4	5	5	4	5	5	5	4	5	4	4	4	4	4	5	5	5	4	5	5	5	4	5	4	5	5	4	4	4	5	5	4	5	4	4.5	4.4	4.75	4.6
217	0	1	4	4	3	4	2	5	4	5	5	4	5	5	5	5	5	5	4	5	4	4	4	4	4	5	5	5	4	5	5	5	4	5	5	5	5	5	5	5	5	5	4	5	5	4.75	4.6	5	4.6
218	0	2	4	4	3	4	2	5	4	4	4	4	5	4	4	5	5	5	4	5	4	4	4	4	4	5	5	5	4	4	5	5	4	4	4	4	4	4	4	4	5	5	4	4	4	4.25	4.2	4.5	4.6
219	0	2	4	4	3	4	3	5	4	4	5	4	5	4	4	5	5	5	4	5	4	4	4	4	4	5	5	5	4	4	5	5	4	4	4	4	4	4	4	4	5	5	4	4	4	4.25	4.4	4.5	4.6
220	0	2	4	4	3	4	3	4	4	4	4	4	4	4	5	5	5	5	4	4	4	4	4	4	4	5	5	5	4	4	5	5	4	4	5	4	4	5	5	5	5	4	4	4	5	4.25	4	4.5	4.4
221	0	2	4	4	3	4	3	4	4	4	4	4	4	4	5	5	5	5	4	4	4	4	4	4	4	5	5	5	4	4	5	5	4	4	5	4	4	5	5	5	5	4	4	4	5	4.25	4	4.5	4.4
222	0	2	4	4	3	4	2	4	4	4	4	4	4	4	5	5	5	5	4	4	4	4	4	4	4	5	5	5	4	4	5	4	4	4	5	4	4	5	5	5	5	4	4	4	5	4.25	4	4.5	4.4
223	0	2	4	3	3	4	2	4	4	4	4	4	4	4	5	5	5	5	4	4	4	4	4	4	5	5	5	5	4	4	5	4	4	4	5	4	4	5	5	5	5	4	4	4	5	4.25	4	4.5	4.4
224	0	2	4	3	3	4	1	4	4	4	4	4	4	4	5	5	5	5	4	4	4	4	4	4	5	5	5	5	4	4	5	4	4	4	5	4	4	5	5	5	5	4	4	4	5	4.25	4	4.5	4.4
225	0	1	4	3	3	4	2	4	4	4	4	4	4	4	5	5	5	5	4	4	4	4	4	4	5	5	5	5	4	4	5	4	4	4	5	4	4	5	5	5	5	4	4	4	5	4.25	4	4.5	4.4
226	0	1	4	3	3	4	3	4	4	4	4	4	4	4	5	5	5	5	4	4	4	4	4	4	5	5	5	5	4	4	5	4	4	4	5	4	4	5	5	5	5	4	4	4	5	4.25	4	4.5	4.4
227	0	1	4	3	3	4	2	4	4	4	4	4	4	4	5	5	5	5	4	4	4	4	4	4	5	5	5	5	4	4	5	4	4	4	5	4	4	5	5	5	5	4	4	4	5	4.25	4	4.5	4.4
228	0	2	4	3	3	4	2	4	4	4	4	4	4	4	5	5	5	5	4	4	4	4	4	4	5	4	5	5	4	4	5	4	4	4	5	4	4	5	5	5	5	4	4	4	5	4.25	4	4.5	4.4
229	0	2	4	3	3	4	2	4	4	4	5	4	4	4	4	5	5	5	4	4	4	4	4	4	5	4	5	5	4	4	5	4	4	4	4	4	4	4	4	4	5	4	4	4	4	4	4.2	4.25	4.4
230	0	4	4	3	3	4	1	4	4	4	5	4	4	4	4	5	5	5	4	4	4	4	4	4	5	4	5	5	4	4	5	4	4	4	4	4	4	4	4	4	5	4	4	4	4	4	4.2	4.25	4.4
231	0	4	3	3	3	4	3	4	4	4	5	4	4	4	4	5	5	5	4	4	4	4	4	4	5	4	5	5	4	4	5	5	4	4	4	4	4	4	4	4	5	4	4	4	4	4	4.2	4.25	4.4
232	0	4	3	3	3	4	3	4	4	4	5	4	4	4	4	5	5	5	4	4	4	4	4	4	5	4	5	5	4	4	5	5	4	4	4	4	4	4	4	4	5	4	4	4	4	4	4.2	4.25	4.4
233	0	3	3	3	3	4	3	4	4	4	4	4	4	4	4	5	5	5	4	4	4	4	4	4	5	4	5	5	4	4	5	5	4	4	4	4	4	4	4	4	5	4	4	4	4	4	4	4.25	4.4
234	0	3	3	3	3	4	2	4	4	4	4	4	4	4	4	5	5	5	4	4	4	4	4	4	5	4	5	5	4	4	5	5	4	4	4	4	4	4	4	4	5	4	4	4	4	4	4	4.25	4.4
235	0	4	3	3	3	4	2	4	4	4	4	4	4	4	5	5	5	5	4	4	4	4	4	4	5	4	5	5	4	4	5	5	4	4	5	4	4	5	5	5	5	4	4	4	5	4.25	4	4.5	4.4
236	0	5	3	3	3	4	1	4	4	4	4	4	4	4	5	5	5	5	4	4	4	4	4	4	5	4	5	5	4	4	5	5	4	4	5	4	4	5	5	5	5	4	4	4	5	4.25	4	4.5	4.4
237	1	2	3	3	3	4	4	4	4	4	4	4	4	4	5	5	5	5	4	4	4	4	4	4	5	4	5	5	4	4	5	5	4	4	5	4	4	5	5	5	5	4	4	4	5	4.25	4	4.5	4.4
238	1	3	5	3	3	4	4	4	4	4	4	4	4	4	5	5	5	5	4	4	4	4	4	4	5	4	5	5	4	4	5	5	4	4	5	4	4	5	5	5	5	4	4	4	5	4.25	4	4.5	4.4
239	0	2	4	3	3	4	1	4	4	4	5	4	4	4	5	5	5	5	4	4	4	4	4	4	5	4	5	5	4	4	5	5	4	4	5	4	4	5	5	5	5	4	4	4	5	4.25	4.2	4.5	4.4
240	0	2	4	3	3	4	2	4	5	4	5	5	4	4	5	5	5	5	5	4	5	4	4	4	5	4	5	5	5	4	5	5	5	4	5	4	4	5	5	5	5	4	5	4	5	4.5	4.6	4.5	4.8
241	1	3	4	3	3	4	3	4	5	4	5	5	4	4	5	5	5	5	5	4	5	4	4	4	5	4	5	5	5	4	5	5	5	4	5	4	4	5	5	5	5	4	5	4	5	4.5	4.6	4.5	4.8
242	1	3	4	3	3	4	4	4	5	4	5	5	4	4	5	5	5	5	5	4	5	4	4	4	5	4	5	5	5	4	5	5	5	4	5	4	4	5	5	5	5	4	5	4	5	4.5	4.6	4.5	4.8
243	0	3	4	3	3	4	3	4	5	4	5	5	4	4	4	5	5	5	5	4	5	4	4	4	5	4	5	5	5	4	5	5	5	4	4	4	4	4	4	4	5	4	5	4	4	4.25	4.6	4.25	4.8
244	1	3	4	3	3	4	1	4	5	4	5	5	4	4	4	5	5	5	5	4	5	4	4	4	5	4	5	5	5	4	5	4	5	4	4	4	4	4	4	4	5	4	5	4	4	4.25	4.6	4.25	4.8
245	0	3	5	3	3	4	2	4	5	4	5	5	4	4	4	5	5	5	5	4	5	4	4	4	5	4	5	5	5	4	5	4	5	4	4	4	4	4	4	4	5	4	5	4	4	4.25	4.6	4.25	4.8
246	0	4	5	3	3	4	3	4	5	4	5	5	4	4	4	5	5	5	5	4	5	4	4	4	5	4	5	5	5	4	5	4	5	4	4	4	4	4	4	4	5	4	5	4	4	4.25	4.6	4.25	4.8
247	0	4	5	3	3	4	4	5	5	4	5	5	5	4	4	5	5	5	5	5	5	4	4	4	5	4	5	5	5	4	5	4	5	4	4	4	4	4	4	4	5	5	5	4	4	4.5	4.8	4.5	5
248	0	4	5	3	3	4	1	5	5	4	5	5	5	4	5	5	5	5	5	5	5	4	4	4	5	4	5	5	5	4	5	4	5	4	5	4	4	5	5	5	5	5	5	4	5	4.75	4.8	4.75	5
249	0	4	5	3	3	4	2	5	5	4	5	5	5	4	5	5	4	5	5	5	5	4	4	4	5	4	5	5	5	4	5	4	5	4	5	4	4	5	5	5	5	5	5	4	5	4.75	4.8	4.75	4.8
250	0	4	3	3	3	4	3	5	5	5	5	5	5	5	5	5	4	5	5	5	5	4	4	4	5	4	5	5	5	5	5	4	5	5	5	4	5	5	5	5	5	5	5	5	5	5	5	5	4.8
251	0	5	2	3	3	4	4	5	5	5	5	5	5	5	5	5	4	5	5	5	5	4	4	4	5	4	5	5	5	5	5	4	5	5	5	4	5	5	5	5	5	5	5	5	5	5	5	5	4.8
252	0	2	5	3	3	4	3	5	5	5	5	5	5	5	5	5	4	5	5	5	5	4	5	4	5	4	5	5	5	5	5	4	5	5	5	4	5	5	5	5	5	5	5	5	5	5	5	5	4.8
253	0	2	5	3	3	4	2	5	5	5	5	5	5	5	4	5	4	5	5	5	5	4	5	4	5	4	5	5	5	5	5	4	5	5	4	4	5	4	4	4	5	5	5	5	4	4.75	5	4.75	4.8
254	1	2	5	3	3	4	1	5	5	5	5	5	5	5	4	5	4	5	5	5	5	4	5	4	5	4	5	5	5	5	5	4	5	5	4	4	5	4	4	4	5	5	5	5	4	4.75	5	4.75	4.8
255	0	2	5	3	3	4	2	5	5	5	5	5	5	5	4	5	4	5	5	5	5	4	5	4	5	4	5	5	5	5	5	4	5	5	4	4	5	4	4	4	5	5	5	5	4	4.75	5	4.75	4.8
256	0	2	5	3	3	4	3	5	4	5	5	4	5	5	4	5	4	5	4	5	4	4	5	4	5	4	5	5	4	5	5	4	4	5	4	4	5	4	4	4	5	5	4	5	4	4.5	4.6	4.75	4.4
257	1	3	4	3	3	4	1	5	4	5	5	4	5	5	4	5	4	5	4	5	4	4	5	4	5	4	5	5	4	5	5	4	4	5	4	4	5	4	4	4	5	5	4	5	4	4.5	4.6	4.75	4.4
258	1	3	4	3	3	4	1	5	4	5	5	4	5	5	4	5	4	5	4	5	4	4	5	4	5	4	5	5	4	5	5	4	4	5	4	4	5	4	4	4	5	5	4	5	4	4.5	4.6	4.75	4.4
259	1	3	4	3	3	2	1	5	4	5	5	4	5	5	4	5	4	5	4	5	4	4	5	4	5	4	5	5	4	5	5	4	4	5	4	4	5	4	4	4	5	5	4	5	4	4.5	4.6	4.75	4.4
260	0	4	4	3	3	3	1	5	4	5	5	4	5	5	4	5	4	4	4	5	4	4	5	4	5	4	5	5	4	5	5	4	4	5	4	4	5	4	4	4	5	5	4	5	4	4.5	4.6	4.75	4.2
261	0	4	4	3	3	3	4	5	4	5	5	4	5	5	4	5	4	4	4	5	4	4	5	4	5	4	5	5	4	5	5	4	4	5	4	4	5	4	4	4	5	5	4	5	4	4.5	4.6	4.75	4.2
262	0	4	4	3	3	3	4	5	5	5	5	5	5	5	4	5	4	4	5	5	5	4	5	4	5	4	5	5	5	5	5	4	5	5	4	4	5	4	4	4	5	5	5	5	4	4.75	5	4.75	4.6
263	0	2	4	3	3	3	4	4	5	5	5	5	4	5	4	5	4	4	5	4	5	4	5	4	5	4	5	5	5	5	5	4	5	5	4	4	5	4	4	4	5	4	5	5	4	4.5	4.8	4.5	4.4
264	0	2	4	3	3	3	4	4	5	5	5	5	4	5	4	5	4	4	5	4	5	4	5	4	5	4	5	5	5	5	5	4	5	5	4	4	5	4	4	4	5	4	5	5	4	4.5	4.8	4.5	4.4
265	1	2	4	3	3	3	4	4	5	5	5	5	4	5	4	5	4	4	5	4	5	4	5	4	5	4	5	5	5	5	5	4	5	5	4	4	5	4	4	4	5	4	5	5	4	4.5	4.8	4.5	4.4
266	1	5	4	3	3	3	4	4	5	4	5	5	4	4	4	5	4	4	5	4	5	4	5	4	5	4	5	5	5	4	5	4	5	4	4	4	4	4	4	4	5	4	5	4	4	4.25	4.6	4.25	4.4
267	1	3	4	3	3	3	4	4	5	4	3	5	4	4	4	5	4	4	5	4	5	4	5	4	5	4	5	5	5	4	5	4	5	4	4	4	4	4	4	4	5	4	5	4	4	4.25	4.2	4.25	4.4
268	1	3	4	3	3	3	3	4	5	4	3	5	4	4	4	5	4	4	5	4	5	5	5	4	5	4	5	5	5	4	5	4	5	4	4	4	4	4	4	4	5	4	5	4	4	4.25	4.2	4.25	4.4
269	0	3	4	3	3	3	3	4	5	4	3	5	4	4	4	5	4	4	5	4	5	5	5	4	5	4	5	5	5	4	5	4	5	4	4	4	4	4	4	4	5	4	5	4	4	4.25	4.2	4.25	4.4
270	0	3	4	3	3	3	3	4	5	4	3	5	4	4	4	5	4	4	5	4	5	5	5	4	5	4	5	5	5	4	5	4	5	4	4	4	4	4	4	4	5	4	5	4	4	4.25	4.2	4.25	4.4
271	0	3	4	3	3	3	3	4	5	4	3	5	4	4	4	5	4	4	5	4	5	5	5	4	5	4	5	5	5	4	5	4	5	4	4	4	4	4	4	4	5	4	5	4	4	4.25	4.2	4.25	4.4
272	0	2	4	3	3	3	2	4	4	5	3	4	4	5	4	5	4	4	4	4	4	5	5	4	5	4	5	5	4	5	5	4	4	5	4	4	5	4	4	4	5	4	4	5	4	4.25	4	4.5	4
273	0	2	4	3	3	3	4	4	4	5	3	4	4	5	4	5	4	4	4	4	4	5	5	4	5	4	5	5	4	5	5	4	4	5	4	4	5	4	4	4	5	4	4	5	4	4.25	4	4.5	4
274	0	2	4	3	3	3	4	4	4	5	3	4	4	5	4	5	4	4	4	4	4	5	5	4	5	4	5	5	4	5	5	4	4	5	4	4	5	4	4	4	5	4	4	5	4	4.25	4	4.5	4
275	0	2	4	3	3	3	4	4	4	5	3	4	4	5	4	4	4	4	4	4	4	5	5	4	5	4	5	5	4	5	5	4	4	5	4	4	5	4	4	4	5	4	4	5	4	4.25	4	4.25	4
276	1	2	4	3	3	3	4	4	4	5	3	4	4	5	4	4	4	4	4	4	4	5	5	4	5	4	5	5	4	5	5	4	4	5	4	4	5	4	4	4	5	4	4	5	4	4.25	4	4.25	4
277	1	2	4	3	3	3	2	4	4	5	3	4	4	5	4	4	4	4	4	4	4	5	5	4	5	4	5	5	4	5	5	4	4	5	4	4	5	4	4	4	5	4	4	5	4	4.25	4	4.25	4
278	1	4	4	3	3	3	2	5	4	5	3	4	5	5	4	4	4	4	4	5	4	5	5	4	5	4	5	5	4	5	5	4	4	5	4	4	5	4	4	4	5	5	4	5	4	4.5	4.2	4.5	4.2
279	0	4	4	3	3	3	1	5	4	5	4	4	5	5	4	4	4	4	4	5	4	5	5	4	5	4	5	5	4	5	5	4	4	5	4	4	5	4	4	4	5	5	4	5	4	4.5	4.4	4.5	4.2
280	0	4	3	3	3	3	1	5	4	4	4	4	5	4	4	4	4	4	4	5	4	5	5	4	5	4	5	5	4	4	5	4	4	4	4	4	4	4	4	4	5	5	4	4	4	4.25	4.2	4.25	4.2
281	0	4	3	3	3	4	1	5	4	4	4	4	5	4	4	4	4	4	4	5	4	5	5	4	5	4	5	5	4	4	5	4	4	4	4	4	4	4	4	4	5	5	4	4	4	4.25	4.2	4.25	4.2
282	0	4	3	3	3	4	3	5	4	4	4	4	5	4	4	4	4	4	4	5	4	5	5	4	5	4	5	5	4	4	5	4	4	4	4	4	4	4	4	4	5	5	4	4	4	4.25	4.2	4.25	4.2
283	0	4	3	3	3	4	3	5	4	4	4	4	5	4	4	4	4	4	4	5	4	5	5	4	5	4	5	5	4	4	5	4	4	4	4	4	4	4	4	4	5	5	4	4	4	4.25	4.2	4.25	4.2
284	0	3	3	3	3	4	3	5	4	4	4	4	5	4	4	4	4	4	4	5	4	5	5	4	5	4	5	5	4	4	5	4	4	4	4	4	4	4	4	4	5	5	4	4	4	4.25	4.2	4.25	4.2
285	0	3	3	3	3	4	2	5	4	5	5	4	5	5	5	4	4	4	4	5	4	5	5	4	5	4	5	5	4	5	5	4	4	5	5	4	5	5	5	5	5	5	4	5	5	4.75	4.6	4.75	4.2
286	0	3	3	3	3	4	1	4	4	4	5	4	4	4	5	4	4	4	4	4	4	5	5	4	5	4	5	5	4	4	5	4	4	4	5	4	4	5	5	5	5	4	4	4	5	4.25	4.2	4.25	4
287	0	3	3	3	3	4	1	4	4	5	4	4	4	5	5	4	4	4	4	4	4	5	5	4	5	4	5	5	4	5	5	4	4	5	5	4	5	5	5	5	5	4	4	5	5	4.5	4.2	4.5	4
288	0	3	3	3	3	4	2	4	4	4	5	4	4	4	5	4	4	4	4	4	4	5	5	4	5	4	5	5	4	4	5	4	4	4	5	4	4	5	5	5	5	4	4	4	5	4.25	4.2	4.25	4
289	0	3	3	3	3	4	3	4	4	4	5	4	4	4	5	4	4	4	4	4	4	5	5	4	5	4	5	5	4	4	5	4	4	4	5	4	4	5	5	5	5	4	4	4	5	4.25	4.2	4.25	4
290	1	3	3	3	3	4	2	4	4	5	5	4	4	5	5	4	4	4	4	4	4	5	4	4	5	4	5	5	4	5	5	4	4	5	5	4	5	5	5	5	5	4	4	5	5	4.5	4.4	4.5	4
291	1	3	3	3	3	4	1	5	4	5	5	4	5	5	5	4	4	4	4	5	4	5	4	4	5	4	5	5	4	5	5	4	4	5	5	4	5	5	5	5	5	5	4	5	5	4.75	4.6	4.75	4.2
292	1	2	3	3	3	4	4	4	4	5	4	4	4	5	5	4	4	4	4	4	4	5	4	4	5	4	5	5	4	5	5	4	4	5	5	4	5	5	5	5	5	4	4	5	5	4.5	4.2	4.5	4
293	1	2	3	3	3	4	4	5	4	5	4	4	5	5	5	4	4	4	4	5	4	5	4	4	5	4	5	5	4	5	5	4	4	5	5	4	5	5	5	5	5	5	4	5	5	4.75	4.4	4.75	4.2
294	1	2	3	3	3	4	4	4	4	5	4	4	4	5	5	4	4	4	4	4	4	5	4	4	5	4	5	5	4	5	5	4	4	5	5	4	5	5	5	5	5	4	4	5	5	4.5	4.2	4.5	4
295	0	1	4	3	3	4	1	4	4	5	4	4	4	5	5	4	4	4	4	4	4	5	4	4	5	4	5	5	4	5	5	4	4	5	5	5	5	5	5	5	5	4	4	5	5	4.5	4.2	4.5	4
296	0	1	4	3	3	4	2	5	4	5	5	4	5	5	5	4	4	4	4	5	4	5	4	4	5	4	5	5	4	5	5	4	4	5	5	5	5	5	5	5	5	5	4	5	5	4.75	4.6	4.75	4.2
297	0	2	4	3	3	4	2	5	4	5	4	4	5	5	5	4	4	4	4	5	4	5	4	4	5	4	5	5	4	5	5	4	4	5	5	4	5	5	5	5	5	5	4	5	5	4.75	4.4	4.75	4.2
298	0	2	4	3	3	4	3	5	4	5	5	4	5	5	5	4	4	4	4	5	4	5	4	4	5	4	5	5	4	5	5	4	4	5	5	4	5	5	5	5	5	5	4	5	5	4.75	4.6	4.75	4.2
299	0	2	4	3	3	4	3	5	4	4	4	4	5	4	5	4	4	4	4	5	4	5	4	4	5	4	5	5	4	4	5	4	4	4	5	4	4	5	5	5	5	5	4	4	5	4.5	4.2	4.5	4.2
300	0	2	4	3	3	4	3	4	4	4	4	4	4	4	5	4	4	4	4	4	4	5	4	4	5	4	5	5	4	4	5	4	4	4	5	4	4	5	5	5	5	4	4	4	5	4.25	4	4.25	4
301	0	2	4	3	3	4	2	4	4	4	4	4	4	4	4	4	4	4	4	4	4	5	4	4	5	4	5	5	4	4	5	4	4	4	4	4	4	4	4	4	5	4	4	4	4	4	4	4	4
302	0	2	4	3	3	4	2	4	4	4	5	4	4	4	4	4	4	5	4	4	4	5	4	4	5	4	5	5	4	4	5	4	4	4	4	4	4	4	4	4	5	4	4	4	4	4	4.2	4	4.2
303	1	3	4	3	3	4	3	5	4	4	5	4	5	4	4	4	4	5	4	5	4	5	4	4	5	4	5	5	4	4	5	4	4	4	4	4	4	4	4	4	5	5	4	4	4	4.25	4.4	4.25	4.4
304	1	3	4	3	3	4	4	5	5	4	5	5	5	4	4	4	4	5	5	5	5	5	4	4	5	4	5	5	5	4	5	4	5	4	4	4	4	4	4	4	5	5	5	4	4	4.5	4.8	4.25	4.8
305	0	3	4	3	3	4	3	5	5	5	5	5	5	5	4	4	4	5	5	5	5	5	4	4	5	4	5	5	5	5	5	4	5	5	4	4	5	4	4	4	5	5	5	5	4	4.75	5	4.5	4.8
306	1	3	4	3	3	4	1	5	5	5	5	5	5	5	4	4	4	5	5	5	5	5	4	4	5	4	5	5	5	5	5	4	5	5	4	4	5	4	4	4	5	5	5	5	4	4.75	5	4.5	4.8
307	0	3	5	3	3	4	2	5	5	5	5	5	5	5	5	4	4	5	5	5	5	5	4	4	5	4	5	5	5	5	5	4	5	5	5	4	5	5	5	5	5	5	5	5	5	5	5	4.75	4.8
308	0	4	5	3	3	4	3	5	5	5	5	5	5	5	5	4	4	5	5	5	5	5	4	4	5	4	5	5	5	5	5	4	5	5	5	4	5	5	5	5	5	5	5	5	5	5	5	4.75	4.8
309	0	4	5	3	3	4	4	5	5	5	5	5	5	5	5	4	4	5	5	5	5	5	4	4	5	4	5	5	5	5	5	4	5	5	5	4	5	5	5	5	5	5	5	5	5	5	5	4.75	4.8
310	0	4	5	3	3	4	1	5	5	5	5	5	5	5	5	4	4	5	5	5	5	5	4	4	5	4	5	5	5	5	5	4	5	5	5	4	5	5	5	5	5	5	5	5	5	5	5	4.75	4.8
311	0	4	5	3	3	4	2	4	5	5	5	5	4	5	5	4	4	5	5	4	5	5	4	4	5	4	5	5	5	5	5	4	5	5	5	4	5	5	5	5	5	4	5	5	5	4.75	4.8	4.5	4.6
312	0	4	5	3	3	4	3	4	5	5	5	5	4	5	5	4	4	5	5	4	5	5	4	4	5	4	5	5	5	5	5	4	5	5	5	4	5	5	5	5	5	4	5	5	5	4.75	4.8	4.5	4.6
313	0	5	5	3	3	4	4	4	5	4	4	5	4	4	5	4	4	5	5	4	5	5	4	4	5	4	5	5	5	4	5	4	5	4	5	4	4	5	5	5	5	4	5	4	5	4.5	4.4	4.25	4.6
314	0	2	5	3	3	4	3	4	5	4	4	5	4	4	5	4	4	5	5	4	5	5	4	4	5	4	5	5	5	4	5	4	5	4	5	4	4	5	5	5	5	4	5	4	5	4.5	4.4	4.25	4.6
315	0	2	5	3	3	4	2	4	5	4	4	5	4	4	5	4	4	5	5	4	5	5	4	4	5	4	5	5	5	4	5	4	5	4	5	4	4	5	5	5	5	4	5	4	5	4.5	4.4	4.25	4.6
316	1	2	5	3	3	4	1	5	5	4	4	5	5	4	4	4	4	5	5	5	5	5	4	4	5	4	5	5	5	4	5	4	5	4	4	4	4	4	4	4	3	5	5	4	4	4.5	4.6	4.25	4.8
317	0	2	5	3	3	4	2	4	5	4	4	5	4	4	4	4	4	5	5	4	5	5	4	4	5	5	5	5	5	4	5	4	5	4	4	4	4	4	4	4	3	4	5	4	4	4.25	4.4	4	4.6
318	0	2	5	3	3	4	3	5	5	5	4	5	5	5	4	4	4	5	5	5	5	5	4	4	5	5	5	5	5	5	5	4	5	5	4	4	5	4	4	4	3	5	5	5	4	4.75	4.8	4.5	4.8
319	1	3	4	3	3	4	1	4	5	4	4	5	4	4	4	4	4	5	5	4	5	5	4	4	5	5	5	5	5	4	5	4	5	4	4	4	4	4	4	4	3	4	5	4	4	4.25	4.4	4	4.6
320	1	3	4	3	3	3	1	4	4	5	4	4	4	5	4	4	4	5	4	4	4	5	4	4	5	5	5	5	4	5	5	4	4	5	4	4	5	4	4	4	4	4	4	5	4	4.25	4.2	4.25	4.2
321	1	3	4	3	3	3	1	5	4	4	4	4	5	4	5	4	4	5	4	5	4	5	4	4	5	5	5	5	4	4	5	4	4	4	5	4	4	5	5	5	4	5	4	4	5	4.5	4.2	4.5	4.4
322	0	4	4	3	3	3	1	5	4	4	4	4	5	4	4	4	4	4	4	5	4	5	4	4	5	5	5	5	4	4	5	4	4	4	4	4	4	4	4	4	4	5	4	4	4	4.25	4.2	4.25	4.2
323	0	4	4	3	3	3	4	5	4	5	4	4	5	5	5	4	4	4	4	5	4	5	4	4	5	5	5	5	4	5	5	4	4	5	5	4	5	5	5	5	4	5	4	5	5	4.75	4.4	4.75	4.2
324	0	4	4	3	3	3	4	5	4	5	4	4	5	5	4	4	4	4	4	5	4	5	4	4	5	5	5	5	4	5	5	4	4	5	4	4	5	4	4	4	4	5	4	5	4	4.5	4.4	4.5	4.2
325	0	2	4	3	3	3	4	4	4	5	4	4	4	5	4	4	4	4	4	4	4	5	4	4	5	5	5	5	4	5	5	5	4	5	4	4	5	4	4	4	4	4	4	5	4	4.25	4.2	4.25	4
326	0	2	4	3	3	3	4	4	5	5	4	5	4	5	5	4	4	4	5	4	5	5	4	4	5	5	5	5	5	5	5	5	5	5	5	4	5	5	5	5	4	4	5	5	5	4.75	4.6	4.5	4.4
327	1	2	4	3	3	3	4	4	5	5	4	5	4	5	5	4	4	4	5	4	5	5	4	4	5	5	5	5	5	5	5	5	5	5	5	4	5	5	5	5	4	4	5	5	5	4.75	4.6	4.5	4.4
328	1	5	4	3	3	3	4	5	5	5	4	5	5	5	5	4	4	4	5	5	5	4	4	4	5	5	5	5	5	5	5	5	5	5	5	4	5	5	5	5	4	5	5	5	5	5	4.8	4.75	4.6
329	1	3	4	3	3	3	4	5	3	5	4	3	5	5	5	4	4	4	3	5	3	4	4	4	5	5	5	5	3	5	5	5	3	5	5	4	5	5	5	5	4	5	3	5	5	4.5	4	4.75	3.8
330	1	3	4	3	3	3	3	5	3	5	4	3	5	5	5	4	4	4	3	5	3	5	4	4	5	5	5	5	3	5	5	5	3	5	5	4	5	5	5	5	4	5	3	5	5	4.5	4	4.75	3.8
331	0	3	4	3	3	3	3	5	3	5	4	3	5	5	5	4	4	4	3	5	3	5	4	4	5	5	5	5	3	5	5	5	3	5	5	4	5	5	5	5	4	5	3	5	5	4.5	4	4.75	3.8
332	0	3	4	3	3	3	3	5	5	4	4	5	5	4	5	4	4	4	5	5	5	5	4	4	5	5	5	5	5	4	5	4	5	4	5	4	4	5	5	5	4	5	5	4	5	4.75	4.6	4.5	4.6
333	0	3	4	3	3	3	3	5	5	4	4	5	5	4	5	4	4	4	5	5	5	5	4	4	5	5	5	5	5	4	5	4	5	4	5	4	4	5	5	5	4	5	5	4	5	4.75	4.6	4.5	4.6
334	0	2	4	3	3	3	2	5	5	4	4	5	5	4	5	4	4	4	5	5	5	5	4	4	5	5	5	5	5	4	5	4	5	4	5	4	4	5	5	5	4	5	5	4	5	4.75	4.6	4.5	4.6
335	0	2	3	3	3	3	4	5	4	4	4	4	5	4	4	4	4	4	4	5	4	5	4	4	5	5	5	5	4	4	5	4	4	4	4	4	4	4	4	4	4	5	4	4	4	4.25	4.2	4.25	4.2
336	0	2	3	3	3	3	4	4	4	4	4	4	4	4	4	4	4	4	4	4	4	5	4	4	5	5	5	5	4	4	5	4	4	4	4	4	4	4	4	4	4	4	4	4	4	4	4	4	4
337	0	2	4	3	3	4	4	4	4	4	3	4	4	4	4	4	4	4	4	4	4	5	4	4	5	5	5	5	4	4	5	4	4	4	4	4	4	4	4	4	4	4	4	4	4	4	3.8	4	4
338	1	2	4	3	3	4	4	4	4	5	3	4	4	5	4	4	4	4	4	4	4	5	4	4	5	5	5	5	4	5	5	4	4	5	4	4	5	4	4	4	4	4	4	5	4	4.25	4	4.25	4
339	1	2	4	3	3	4	2	4	4	5	3	4	4	5	4	4	4	4	4	4	4	5	4	4	5	5	5	5	4	5	5	4	4	5	4	4	5	4	4	4	4	4	4	5	4	4.25	4	4.25	4
340	1	4	4	3	3	4	2	4	5	5	3	5	4	5	4	4	4	4	5	4	5	5	4	4	5	5	5	5	5	5	5	4	5	5	4	4	5	4	4	4	4	4	5	5	4	4.5	4.4	4.25	4.4
341	0	4	4	3	3	4	1	5	4	5	4	4	5	5	5	4	4	4	4	5	4	5	4	4	4	5	5	5	4	5	5	4	4	5	5	5	5	5	5	5	4	5	4	5	5	4.75	4.4	4.75	4.2
342	0	4	5	3	3	4	1	4	5	5	4	5	4	5	5	4	4	4	5	4	5	5	4	4	4	5	5	5	5	5	5	4	5	5	5	5	5	5	5	5	4	4	5	5	5	4.75	4.6	4.5	4.4
343	0	4	5	3	3	4	1	5	4	5	4	4	5	5	5	4	4	4	4	5	4	5	4	4	4	5	5	5	4	5	5	4	4	5	5	5	5	5	5	5	4	5	4	5	5	4.75	4.4	4.75	4.2
344	0	4	5	3	3	4	3	4	4	5	4	4	4	5	5	4	4	4	4	4	4	5	4	4	4	5	5	5	4	5	5	4	4	5	5	5	5	5	5	5	4	4	4	5	5	4.5	4.2	4.5	4
345	0	4	5	3	3	4	3	4	5	5	4	5	4	5	5	4	4	4	5	4	5	5	4	4	4	5	5	5	5	5	5	4	5	5	5	5	5	5	5	5	4	4	5	5	5	4.75	4.6	4.5	4.4
346	0	3	5	3	3	4	3	5	5	4	4	5	5	4	5	4	4	4	5	5	5	5	4	4	4	5	5	5	5	4	5	4	5	4	5	5	4	5	5	5	4	5	5	4	5	4.75	4.6	4.5	4.6
345	0	3	5	3	3	4	2	5	5	4	5	5	5	4	5	4	4	4	5	5	5	5	4	4	4	5	5	5	5	4	5	4	5	4	5	5	4	5	5	5	4	5	5	4	5	4.75	4.8	4.5	4.6
346	0	3	5	3	3	4	1	5	5	4	5	5	5	4	5	4	4	4	5	5	5	5	4	4	4	5	5	5	5	4	5	4	5	4	5	5	4	5	5	5	4	5	5	4	5	4.75	4.8	4.5	4.6
347	0	3	5	3	3	4	1	5	5	4	4	5	5	4	4	4	4	4	5	5	5	5	4	4	4	5	5	5	5	4	5	4	5	4	4	5	4	4	4	4	4	5	5	4	4	4.5	4.6	4.25	4.6
348	0	3	5	4	3	4	2	5	5	4	5	5	5	4	4	4	4	4	5	5	5	5	4	4	4	5	5	5	5	4	5	4	5	4	4	5	4	4	4	4	4	5	5	4	4	4.5	4.8	4.25	4.6
349	0	3	5	4	3	4	3	5	5	5	5	5	5	5	4	4	4	4	5	5	5	5	4	4	4	5	5	5	5	5	5	4	5	5	4	5	5	4	4	4	4	5	5	5	4	4.75	5	4.5	4.6
350	1	3	5	4	3	4	2	5	5	4	5	5	5	4	4	4	4	4	5	5	5	5	4	4	4	5	5	5	5	4	5	4	5	4	4	5	4	4	4	4	4	5	5	4	4	4.5	4.8	4.25	4.6
351	1	3	5	4	3	4	1	5	5	5	5	5	5	5	4	4	4	4	5	5	5	5	4	4	4	5	5	5	5	5	5	4	5	5	4	5	5	4	4	4	4	5	5	5	4	4.75	5	4.5	4.6
352	1	2	5	4	3	4	4	5	4	4	4	5	5	4	5	5	4	4	4	5	4	5	4	4	4	5	5	5	4	4	5	4	4	4	5	5	4	5	5	5	4	5	4	4	5	4.5	4.4	4.75	4.2
353	1	2	3	4	3	4	4	4	4	4	4	5	4	4	4	5	4	4	4	4	4	5	4	4	4	5	5	5	4	4	5	4	4	4	4	5	4	4	4	4	4	4	4	4	4	4	4.2	4.25	4
354	1	2	3	4	3	4	4	4	4	5	4	5	4	5	5	5	4	4	4	4	4	5	4	4	4	5	5	5	4	5	5	4	4	5	5	5	5	5	5	5	4	4	4	5	5	4.5	4.4	4.75	4
355	0	1	4	4	3	4	1	4	4	4	4	5	4	5	4	5	4	4	4	4	4	5	4	4	4	5	5	5	4	5	5	4	4	5	4	5	5	4	4	4	4	4	4	5	4	4.25	4.2	4.5	4
356	0	1	4	4	3	4	2	4	4	4	5	5	4	5	4	5	4	4	4	4	4	5	4	4	4	5	5	5	4	5	5	4	4	5	4	5	5	4	4	4	4	4	4	5	4	4.25	4.4	4.5	4
357	0	2	4	4	3	4	2	4	4	4	4	5	4	5	5	5	4	4	4	4	4	5	4	4	4	5	5	5	4	5	5	4	4	5	5	4	5	5	5	5	4	4	4	5	5	4.5	4.2	4.75	4
358	0	2	4	4	3	4	3	4	4	4	5	5	4	5	5	5	4	4	4	4	4	5	4	4	4	5	5	5	4	5	5	4	4	5	5	4	5	5	5	5	4	4	4	5	5	4.5	4.4	4.75	4
359	0	2	4	4	3	4	3	4	4	4	4	5	4	5	5	5	4	4	4	4	4	5	4	4	4	5	5	5	4	5	5	4	4	5	5	4	5	5	5	5	4	4	4	5	5	4.5	4.2	4.75	4
360	0	2	4	4	3	4	3	4	4	4	4	5	4	5	5	5	4	4	4	4	4	5	4	4	4	5	5	5	4	5	5	5	4	5	5	4	5	5	5	5	4	4	4	5	5	4.5	4.2	4.75	4
361	0	2	4	4	3	4	2	4	4	4	4	5	4	5	5	5	4	5	4	4	4	5	4	4	4	5	5	5	4	5	5	5	4	5	5	4	5	5	5	5	4	4	4	5	5	4.5	4.2	4.75	4.2
362	0	3	4	4	3	4	3	4	4	4	4	5	4	5	5	5	4	5	4	4	4	5	4	4	4	5	5	5	4	5	5	5	4	5	5	5	5	5	5	5	4	4	4	5	5	4.5	4.2	4.75	4.2
363	0	3	4	4	3	4	2	4	4	4	5	5	4	5	5	5	4	5	4	4	4	5	4	4	4	5	5	5	4	5	5	5	4	5	5	5	5	5	5	5	4	4	4	5	5	4.5	4.4	4.75	4.2
364	0	3	4	4	3	4	1	4	4	4	5	5	4	5	5	5	4	5	4	4	4	5	4	4	4	5	5	5	4	5	5	5	4	5	5	5	5	5	5	5	4	4	4	5	5	4.5	4.4	4.75	4.2
365	0	3	4	4	3	4	1	4	4	4	4	5	4	5	5	5	4	5	4	4	4	5	4	4	4	5	5	5	4	5	5	5	4	5	5	5	5	5	5	5	4	4	4	5	5	4.5	4.2	4.75	4.2
366	0	3	4	4	3	4	2	4	4	4	5	5	4	5	5	5	4	5	4	4	4	5	4	4	4	5	5	5	4	5	5	5	4	5	5	5	5	5	5	5	4	4	4	5	5	4.5	4.4	4.75	4.2
367	0	3	4	4	3	4	3	4	4	4	5	5	4	5	5	5	4	5	4	4	4	5	4	4	4	5	5	5	4	5	5	5	4	5	5	5	5	5	5	5	4	4	4	5	5	4.5	4.4	4.75	4.2
[truncated: 4 more columns]

## Sheet: Code 
Variable	N	Missing	Type
Respondent_ID	368	0	numeric
Gender	368	0	numeric
Age	368	0	numeric
Education_Level	368	0	numeric
Business_Age	368	0	numeric
Firm_Size	368	0	numeric
Industry_Type	368	0	numeric
Ownership_Structure	368	0	numeric
FL1	368	0	numeric
FL2	368	0	numeric
FL3	368	0	numeric
FL4	368	0	numeric
FL5	368	0	numeric
BC6	368	0	numeric
BC7	368	0	numeric
BC8	368	0	numeric
BC9	368	0	numeric
ACF10	368	0	numeric
ACF11	368	0	numeric
ACF12	368	0	numeric
ACF13	368	0	numeric
ACF14	368	0	numeric
FR15	368	0	numeric
FR16	368	0	numeric
FR17	368	0	numeric
FR18	368	0	numeric
FR19	368	0	numeric
FR20	368	0	numeric
EXE21	368	0	numeric
EXE22	368	0	numeric
EXE23	368	0	numeric
EXE24	368	0	numeric
TD25	368	0	numeric
TD26	368	0	numeric
TD27	368	0	numeric
TD28	368	0	numeric
Q29	368	0	numeric
Q30	368	0	numeric
Q31	368	0	numeric
Q32	368	0	numeric
Q33	368	0	numeric
Q34	368	0	numeric
FMP_composite	368	0	numeric

## Sheet: Sheet2
Variable	Section	Label	Question_Text	Measure	Type_x	Allowed_Values	Coding	Scale/Range	Composite?	N	Missing	Mean	SD	Min	Max	Type_y
Age	Demographics	Age	Age	Ordinal	Integer (coded categories)	1=Below 25; 2=25–34; 3=35–44; 4=45–54; 5=55+	See Allowed_Values		No	368	0	2.82609	0.952366	1	5	numeric
Business_Age	Demographics	Business Age	Business Age	Ordinal	Integer (coded categories)	1=Less than 2 years; 2=2–5 years; 3=6–10 years; 4=Above 10 years	See Allowed_Values		No	368	0	3.66033	0.999374	2	5	numeric
Education_Level	Demographics	Education Level	Education Level	Ordinal	Integer (coded categories)	1=Primary; 2=Secondary; 3=TVET; 4=Diploma; 5=Degree; 6=Postgraduate	See Allowed_Values		No	368	0	3.26359	1.03011	2	5	numeric
Firm_Size	Demographics	Firm Size	Firm Size	Ordinal	Integer (coded categories)	1=1–5 employees; 2=6–30 employees; 3=31–100 employees	See Allowed_Values		No	368	0	3	0	3	3	numeric
Gender	Demographics	Gender	Gender	Nominal	Integer (coded categories)	0=Male; 1=Female	See Allowed_Values		No	368	0	0.274457	0.446848	0	1	numeric
Industry_Type	Demographics	Industry Type	Industry Type	Nominal	Integer (coded categories)	1=Agriculture; 2=Service; 3=Retail/Trade; 4=Manufacturing; 5=Other	See Allowed_Values		No	368	0	2.40761	1.31731	1	4	numeric
Ownership_Structure	Demographics	Ownership Structure	Ownership Structure	Nominal	Integer (coded categories)	1=Sole proprietor; 2=Partnership; 3=Family-owned; 4=Private Limited	See Allowed_Values		No	368	0	2.53261	1.09943	1	4	numeric
FL1	Financial Literacy & Experience	I understand basic accounting principles.	I understand basic accounting principles.	Ordinal (Likert 1–5)	Integer	1=Strongly Disagree, 2=Disagree, 3=Neutral, 4=Agree, 5=Strongly Agree	Higher=more of the construct	1–5	Yes	368	0	3.89946	0.776494	2	5	numeric
FL2	Financial Literacy & Experience	I can correctly interpret financial statements.	I can correctly interpret financial statements.	Ordinal (Likert 1–5)	Integer	1=Strongly Disagree, 2=Disagree, 3=Neutral, 4=Agree, 5=Strongly Agree	Higher=more of the construct	1–5	Yes	368	0	4.41576	0.69914	3	5	numeric
FL3	Financial Literacy & Experience	I have adequate experience in managing business finances.	I have adequate experience in managing business finances.	Ordinal (Likert 1–5)	Integer	1=Strongly Disagree, 2=Disagree, 3=Neutral, 4=Agree, 5=Strongly Agree	Higher=more of the construct	1–5	Yes	368	0	4.34783	0.683552	3	5	numeric
FL4	Financial Literacy & Experience	I regularly analyze my business financial performance.	I regularly analyze my business financial performance.	Ordinal (Likert 1–5)	Integer	1=Strongly Disagree, 2=Disagree, 3=Neutral, 4=Agree, 5=Strongly Agree	Higher=more of the construct	1–5	Yes	368	0	3.95924	0.83256	3	5	numeric
FL5	Financial Literacy & Experience	I feel confident making financial decisions for my business.	I feel confident making financial decisions for my business.	Ordinal (Likert 1–5)	Integer	1=Strongly Disagree, 2=Disagree, 3=Neutral, 4=Agree, 5=Strongly Agree	Higher=more of the construct	1–5	Yes	368	0	4.82065	0.511883	3	5	numeric
Respondent_ID	Metadata	Respondent unique identifier	System-generated ID for each respondent	Identifier	Integer	Positive integers	Unique per row		No	368	0	184.647	106.792	1	367	numeric

## Sheet: Sheet3
Composite_Variable	Section	Items	Computation	Theoretical_Range
Financialliteracy_composite	Financial Literacy & Experience	FL1, FL2, FL3, FL4, FL5	Mean of listed items (Likert 1–5) — no reverse-coded items	[1, 5]
Business_Characteristics_composite	Business Characteristics	BC1, BC2, BC3, BC4	Mean of listed items (Likert 1–5) — no reverse-coded items	[1, 5]
Access_to_Finance_composite	Access to Finance	ACF1, ACF2, ACF3, ACF4, ACF5	Mean of listed items (Likert 1–5) — no reverse-coded items	[1, 5]
Financial_Resilience_composite (not in file)	Financial Resilience	FR1, FR2, FR3, FR4, FR5, FR6	Mean of listed items (Likert 1–5) — no reverse-coded items	[1, 5]
External_Environment_composite	External Environment	EXE1, EXE2, EXE3, EXE4	Mean of listed items (Likert 1–5) — no reverse-coded items	[1, 5]
Technology_Digitalization_composite	Technology & Digitalization	TD1, TD2, TD3, TD4	Mean of listed items (Likert 1–5) — no reverse-coded items	[1, 5]
Human_Capital_composite	Human Capital	HC1, HC2, HC3	Mean of listed items (Likert 1–5) — no reverse-coded items	[1, 5]
Strategic_Orientation	Strategic Orientation	SO1, SO2, SO3	Mean of listed items (Likert 1–5) — no reverse-coded items	[1, 5]
FMP_composite	Financial Management Practice	FM1, FM2, FM3, FM4	Mean of listed items (Likert 1–5) — no reverse-coded items	[1, 5]
