# Supplementary material
Source: Research Square preprint supplement (doi:10.21203/rs.3.rs-8910578/v1)
Supplement: Supplementary file 3 [file 4b3d6abcebf0b2b0fb445301.docx]

## Questionnaire

## The purpose of this questionnaire​ is to‍ coll​ect dat‌a for​ a res‌earch stu‌d⁠y⁠ titled “Dete⁠rminants of Financial Manageme‌nt Pract‍ices a​mong Small and Medium Enterpris⁠es (‌SMEs) in Ethiop‍ia.” The informati⁠on you provi​de will help the research‍er und​er​stand the factors that in⁠fluence how SM‌Es man⁠a‍ge t‌he​ir finances, inc‍luding aspe⁠cts related to‍ fi‍nancial literacy, business charact⁠eristics, access to finance, t‍echnology, hum‌an ca⁠pital, and the ext‌ernal​ en​v‍i‌ronment. Your respo​nses are valua⁠ble and w⁠ill‍ contri‌but⁠e significantly to improvin⁠g academ​ic knowledge and in‌forming pol‍icy and manag‌erial practices related to SME f​inanc​ial management. All information you pro‍vide will be‌ trea⁠ted with strict confi‌de‌ntia‍lity and use⁠d solely for r‌esearch purposes⁠.

## Instructions to Respondents

## Please indicate your level of agreement with each statement using the following scale:

## 1 = Strongly Disagree 2 = Disagree 3 = Neutral 4 = Agree 5 = Strongly Agree

## Section A: Demographic Information

1. Gender: ☐ Male ☐ Female
2. Age: ☐ Below 25 ☐ 25–34 ☐ 35–44 ☐ 45–54 ☐ 55+
3. Education Level: ☐ Primary ☐ Secondary ☐ TVET ☐ Diploma ☐ Degree ☐ Postgraduate
4. Business Age: ☐ Less than 2 years ☐ 2–5 years ☐ 6–10 years ☐ Above 10 years
5. Firm Size (number of employees): ☐ 1–5 ☐ 6–30 ☐ 31–100
6. Industry Type: ☐ Agriculture ☐ Service ☐ Retail/Trade ☐ Manufacturing☐ Other
7. Ownership Structure: ☐ Sole proprietor ☐ Partnership ☐ Family-owned ☐ Private Limited

## SECTION B: Determinants of Financial Management

Please indicate your level of agreement with each statement using the following scale:

1 = Strongly Disagree 2 = Disagree 3 = Neutral 4 = Agree 5 = Strongly Agree

| 1. Financial Literacy & Experience | | | | | | |
| --- | --- | --- | --- | --- | --- | --- |
| # | Statement | 1 | 2 | 3 | 4 | 5 |
| 1 | I understand basic accounting principles. |  |  |  |  |  |
| 2 | I can correctly interpret financial statements. |  |  |  |  |  |
| 3 | I have adequate experience in managing business finances. |  |  |  |  |  |
| 4 | I regularly analyze my business financial performance. |  |  |  |  |  |
| 5 | I feel confident making financial decisions for my business. |  |  |  |  |  |
| 2. Business Characteristics | | | | | | |
| 1 | My business size allows me to implement structured financial systems. |  |  |  |  |  |
| 2 | As the business grows, financial management becomes more formal. |  |  |  |  |  |
| 3 | The nature of my industry influences how I manage finances. |  |  |  |  |  |
| 4 | The age of my business helps determine the financial practices I use. |  |  |  |  |  |
| 3. Access to Finance | | | | | | |
| 1 | My business has easy access to credit from financial institutions. |  |  |  |  |  |
| 2 | Collateral requirements make it difficult to obtain loans. |  |  |  |  |  |
| 3 | The interest rates offered by lenders affect my borrowing decisions. |  |  |  |  |  |
| 4 | I have good relationships with banks and microfinance institutions. |  |  |  |  |  |
|  | Access to external finance improves my financial management activities. |  |  |  |  |  |
| 4. External Environment | | | | | | |
| 1 | Inflation affects my business financial decisions. |  |  |  |  |  |
| 2 | Government regulations influence how I manage my finances. |  |  |  |  |  |
| 3 | Tax policies affect my financial planning. |  |  |  |  |  |
| 4 | Competition in the market impacts financial management. |  |  |  |  |  |
| 5. Technology and Digitalization | | | | | | |
| 1 | I use accounting software (e.g., QuickBooks, Peachtree). |  |  |  |  |  |
| 1 | I use mobile money/digital payments for transactions. |  |  |  |  |  |
| 3 | Technology helps me improve financial record‑keeping. |  |  |  |  |  |
| 4 | Fintech services make it easier to access financing. |  |  |  |  |  |
| 6. Human Capital (Skills of Staff) | | | | | | |
| 1 | My staff are skilled in accounting and record‑keeping. |  |  |  |  |  |
| 2 | Employees receive training in financial management. |  |  |  |  |  |
| 3 | The business has clear separation of duties for financial tasks. |  |  |  |  |  |
| 7. Strategic Orientation | | | | | | |
| 1 | My business has a clear growth strategy. |  |  |  |  |  |
| 2 | Financial planning supports business expansion. |  |  |  |  |  |
| 3 | We plan investments carefully based on financial forecasts. |  |  |  |  |  |
| Financial Management Practice | | | | | | |
| 1 | My firm demonstrates strong financial knowledge, including preparing budgets, forecasting cash flow, understanding financial products, and identifying appropriate sources of financing. |  |  |  |  |  |
| 2 | My firm maintains a responsible financial attitude by controlling expenses, setting financial goals, balancing risk, and making informed financial decisions. |  |  |  |  |  |
| 3 | My firm exercises effective financial control, including monitoring debt levels, ensuring record accuracy, reviewing performance regularly, and maintaining accountability. |  |  |  |  |  |
| 4 | My firm consistently saves part of its income, keeps financial reserves, plans future investments using savings, and reduces reliance on borrowing. |  |  |  |  |  |
